1 **Mechano-redox control of Mac-1 de-adhesion from ICAM-1 by protein disulfide isomerase**  
2 **promotes directional movement of neutrophils under flow**

3 Alexander Dupuy<sup>1,2</sup>, Camilo Aponte Santamaría<sup>3</sup>, Adva Yehekel<sup>5</sup>, Frauke Gräter<sup>3,4</sup>, Philip J.  
4 Hogg<sup>6\*</sup>, Freda H. Passam<sup>1,2\*</sup> and Joyce Chiu<sup>6, 7\*</sup>

5 1. Heart Research Institute, University of Sydney, Sydney, New South Wales, Australia

6 2. Central Clinical School, Faculty of Medicine and Health, University of Sydney, Sydney, New  
7 South Wales, Australia

8 3. Heidelberg Institute of Theoretical Studies, Heidelberg, Germany

9 4. Interdisciplinary Center for Scientific Computing, Heidelberg University, Heidelberg,  
10 Germany

11 5. Blavatnik Center for Drug Discovery, Tel Aviv University, Israel

12 6. The Centenary Institute, University of Sydney, Sydney, New South Wales, Australia

13 7. School of Medical Science, Faculty of Medicine and Health, University of Sydney, Sydney,  
14 New South Wales, Australia

15 \*Co-senior authors

16 For correspondence: [freda.passam@sydney.edu.au](mailto:freda.passam@sydney.edu.au); [joyce.chiu@sydney.edu.au](mailto:joyce.chiu@sydney.edu.au)

17

18 **Abstract**

19 Macrophage-1 antigen or Mac-1 (CD11b/CD18,  $\alpha\text{M}\beta 2$ ) is a leukocyte integrin essential for firm  
20 adhesion of neutrophils, lymphocytes and monocytes against flow when recruited to the  
21 endothelium. To migrate to the site of inflammation, leukocytes require coordinated adhesion  
22 and de-adhesion for directional movement. The vascular thiol isomerase, protein disulfide  
23 isomerase (PDI), was found by fluorescence microscopy to colocalize with high affinity Mac-1 at  
24 the trailing edge of stimulated neutrophils when adhered to ICAM-1 under fluid shear. From  
25 differential cysteine alkylation and mass spectrometry studies, PDI cleaves two allosteric  
26 disulfide bonds, C169-C176 and C224-C264, in the  $\beta\text{I}$  domain of the  $\beta 2$  subunit, and in  
27 mutagenesis and cell transfection studies, cleavage of the C224-C264 disulfide bond was  
28 shown to selectively control Mac-1 dis-engagement from ICAM-1 under fluid shear. Molecular  
29 dynamics simulations and binding of conformation-specific antibodies reveal that cleavage of  
30 the C224-C264 bond induces conformational change and mechanical stress in the  $\beta\text{I}$  domain  
31 that allosterically alters exposure of an  $\alpha\text{I}$  domain epitope and shifts Mac-1 to a lower affinity  
32 state. From studies of neutrophil adherence to ICAM-1 under fluid shear, these molecular  
33 events promote neutrophil motility in the direction of flow at high shear stress. In summary,  
34 shear-dependent PDI cleavage of neutrophil Mac-1 C224-C264 disulfide bond triggers Mac-1  
35 de-adherence from ICAM-1 at the trailing edge of the cell and enables directional movement of  
36 neutrophils during inflammation.

37

## 38 **Introduction**

39 The integrin macrophage-1 antigen or Mac-1 (CD11b/CD18,  $\alpha$ M $\beta$ 2) is essential for the  
40 recruitment of leukocytes to sites of infection or injury. It binds to a variety of ligands including  
41 intercellular adhesion molecule 1 (ICAM-1), fibrinogen, complement fragment iC3b and CD40  
42 ligand (CD40L) to elicit an inflammatory response. To migrate to the site of infection and injury,  
43 circulating leukocytes tether and roll on vessel wall by interacting with selectins expressed on  
44 endothelial cells, reducing their velocity. Their initial contacts trigger G-protein coupled receptors  
45 for inside-out signaling leading to integrin activation and binding to endothelial ICAM-1 (Ley et  
46 al., 2007). Integrin-mediated adhesion leads to assembly of focal adhesions and cytoskeletal  
47 remodeling to enable cell spreading and firm anchorage of leukocytes against shear force  
48 (Lefort et al., 2009; Smith et al., 2005; Takami et al., 2001). As leukocytes become polarized for  
49 directional crawling, their trailing edge needs to detach to move forward. Various mechanisms  
50 have been reported to enable cell de-adhesion. For instance, shedding of integrin by  
51 metalloproteinases has been described to enable exit of macrophages from the site of  
52 inflammation (Gomez et al., 2012). Internalization of integrin by clathrin-mediated endocytosis is  
53 another important mechanism that allows disassembly of focal adhesions and detachment of  
54 cells from substrata (Bai et al., 2017; Ezratty et al., 2009). These mechanisms rely on removal  
55 of functional integrin from the cell. We have described a mechanism of integrin dis-engagement  
56 that involves allosteric changes in the integrin binding sites (Passam et al., 2018).

57 De-adhesion of platelet integrin  $\alpha$ IIb $\beta$ 3 (GPIIb/IIIa, CD61/CD41) from fibrinogen occurs via  
58 force-dependent cleavage of an allosteric disulfide bond in the integrin binding site (Passam et  
59 al., 2018). A member of the vascular thiol isomerase family, ERp5, cleaves a disulfide bond in  
60 the  $\beta$ 3 subunit to release platelets from fibrinogen. The archetypal thiol isomerase, protein  
61 disulfide isomerase (PDI), has been demonstrated to be essential in Mac-1-dependent  
62 neutrophil migration during inflammation. Mac-1 becomes upregulated during inflammation to  
63 mediate neutrophil adhesion and crawling (Sumagin et al., 2010). Conditional knockout of PDI in  
64 murine neutrophils led to their impaired adhesion and crawling on inflamed endothelium (Hahm  
65 et al., 2013).

66 Here, we report a mechano-redox mechanism that mediates Mac-1 de-adhesion selectively  
67 from ICAM-1. PDI colocalizes with high affinity Mac-1 at the trailing edge of neutrophils, and  
68 cleaves a disulfide bond in the headpiece of the  $\beta$ 2 subunit that changes Mac-1 conformation to  
69 a lower affinity state. PDI cleavage of the Mac-1 disulfide bond promotes neutrophil movement  
70 in the direction of fluid shear. This mechano-redox regulation by PDI provides a mechanism for  
71 neutrophils to de-adhere from ICAM-1 that is essential for directional movement and migration  
72 during inflammation.

73

## 74 **Results**

### 75 **Surface PDI colocalizes with high affinity Mac-1 at the trailing edge of neutrophils** 76 **adhering to ICAM-1**

77 Hahm et al. demonstrated that PDI-null neutrophils exhibited defective migration on TNF $\alpha$   
78 inflamed endothelium and that such migration could be restored by addition of recombinant PDI  
79 (Hahm et al., 2013). As neutrophil adhesion and crawling on endothelium is predominantly  
80 dependent on Mac-1 binding to endothelial ICAM-1, co-localization of surface PDI and Mac-1

81 was measured in fixed neutrophils adhered to immobilized ICAM-1. Using anti-PDI antibody DL-  
82 11, low level of PDI was detected on the surface of untreated neutrophils adhered to ICAM-1  
83 (**Figure 1 – figure supplement 1**). Using anti-CD11b antibody, CBRM1/5, that recognizes an  
84 activation-specific epitope in the I domain of  $\alpha M$  ( $\alpha I$  domain) that is exposed only in Mac-1 at  
85 high affinity state (Oxvig et al., 1999), high affinity Mac-1 was hardly detected in resting  
86 neutrophils. Upon stimulation with fMLF, PDI and high affinity Mac-1 were readily detected on  
87 the neutrophil surface. Increased cell surface PDI was detected in fMLF-stimulated neutrophils  
88 in accordance with a previous report (Hahm et al., 2013), which was accompanied by Mac-1  
89 upregulation (Kishimoto et al., 1989). PDI predominately colocalized with high affinity Mac-1  
90 clusters associated with focal adhesion points for firm adhesion of neutrophils on ICAM-1.

91 To determine if surface PDI colocalizes with high affinity Mac-1 during neutrophil crawling,  
92 neutrophils were stained with anti-PDI antibody and CBRM1/5, stimulated by fMLF and perfused  
93 onto microfluidic chips coated with ICAM-1 and left to settle. Adhered neutrophils were then  
94 subjected to shear stress representing venous or arterial vessel at 0.7 or 5.6 dynes/cm<sup>2</sup>  
95 (Sakariassen et al., 2015), respectively, and imaged in real-time by confocal microscopy.  
96 Adhered neutrophils exhibited polarized morphology in presence of fluid shear with leading and  
97 trailing edges clearly defined on DIC images (Valignat et al., 2014). PDI was found to localize in  
98 the trailing edge of neutrophils while high affinity Mac-1 also predominately formed clusters in  
99 the trailing edge but was also detected in the middle of crawling neutrophils as previously  
100 reported (Hyun et al., 2019) (**Figure 1A**). The fractions of PDI and Mac-1 that overlapped in  
101 leading and trailing edges were measured and expressed as Manders' colocalization  
102 coefficients (**Figure 1B** and **Supplementary File 1 Table S1**). Half of PDI fluorescence at the  
103 trailing edge was found to overlap with Mac-1 fluorescence at the trailing edge (Manders'  
104 colocalization coefficient for PDI is  $0.5512 \pm 0.1957$  and  $0.5287 \pm 0.2368$  at 0.7 and 5.6  
105 dynes/cm<sup>2</sup> respectively) as compared to only 13-20% of PDI fluorescence in the leading edge  
106 overlapping with Mac-1 fluorescence in the leading edge (Manders' colocalization coefficient for  
107 PDI:  $0.1969 \pm 0.1355$  and  $0.132 \pm 0.1257$  at 0.7 and 5.6 dynes/cm<sup>2</sup>, respectively). Similarly,  
108 half of Mac-1 fluorescence at trailing edge was found to overlap with PDI fluorescence at the  
109 trailing edge as compared to only 20-25% of Mac-1 fluorescence in the leading edge  
110 (**Supplementary File 1 Table S1**). This indicates that PDI and high affinity Mac-1 were more  
111 colocalized in the trailing edge than in the leading edge of crawling neutrophils.

112 Colocalization of PDI and Mac-1 in the trailing edge of crawling neutrophils suggests that PDI is  
113 manipulating disulfide bonds in Mac-1. This was measured using differential cysteine alkylation  
114 and mass spectrometry.

115

## 116 **PDI cleaves two disulfide bonds in the $\beta 2$ integrin**

117 Recombinant Mac-1 protein purified from human embryonic kidney cells was incubated with 10-  
118 fold molar excess of redox active PDI or redox inactive PDI (riPDI). Both catalytic cysteines in  
119 the  $\alpha$  and  $\alpha'$  domains were replaced with alanine in riPDI. Unpaired cysteines in Mac-1 were  
120 alkylated with the thiol alkylator 2-iodo-N-phenylacetamide (<sup>12</sup>C-IPA) followed by reduction of  
121 disulfide bonds by DTT and labeling of disulfide cysteines with a carbon-13 isotope of IPA (<sup>13</sup>C-  
122 IPA) (**Figure 2A**). The protein was digested by proteases and the peptides were analyzed by  
123 mass spectrometry. Forty-nine cysteine-containing peptides representing 24 of the 28 disulfide  
124 bonds in the  $\beta 2$  integrin subunit were detected and analyzed (**Figure 2B, Figure 2 – figure**

125 **supplement 1** and **Supplementary File 1 Table S2**). Using existing crystal structures of  
126 extended  $\alpha V\beta 3$  (Xiong et al., 2009) and bent  $\alpha X\beta 2$  (Sen and Springer, 2016) and sequence  
127 alignment, a model of extended Mac-1 structure was constructed and the positions of the 28  
128 disulfide bonds indicated (**Figure 2C**). The four disulfide bonds which were not resolved (C514-  
129 C537, C519-C535, C581-C590 and C593-C596) occur in the cysteine-rich EGF3 and EGF4  
130 domains (**Figure 2C**). The redox state of the  $\beta 2$  disulfide bonds ranged from 90-98% oxidized in  
131 untreated control, which is in general agreement with the structure of mature  $\beta 2$  integrin where  
132 all disulfide bonds were found to be intact (Sen and Springer, 2016). Addition of redox active but  
133 not redox inactive PDI resulted in almost complete (>90%) and selective reduction of the C169-  
134 C176 and C224-C264 disulfide bonds in the  $\beta 1$  domain (**Figure 2B**).

135 The  $\beta 2$   $\beta 1$  domain together with the  $\beta$ -propeller and I domain from the  $\alpha M$  integrin subunit form  
136 the headpiece of the integrin. PDI cleavage of the  $\beta 1$  domain disulfide bonds suggested that this  
137 vascular thiol isomerase might influence Mac-1 binding to ICAM-1.

138

### 139 **Ablation of the C224-C264 disulfide bond promotes Mac-1 de-adhesion from ICAM-1** 140 **under shear force**

141 To study the effect of cleavage of the  $\beta 1$  domain C169-C176 and C224-C264 disulfide bonds on  
142 binding of ligands to Mac-1, mammalian cells were transfected with wild-type or disulfide mutant  
143 integrins. One or both disulfide bonds were ablated by replacing the disulfide cysteines with  
144 serine, baby hamster kidney (BHK) cells stably transfected with wild-type  $\alpha M$  and either wild-  
145 type  $\beta 2$  or mutant  $\beta 2$ , and cells selected for comparable expression of the receptors (**Figure**  
146 **3A**). Initially, Mac-1 binding to immobilized ICAM-1 in a static cell adhesion assay was  
147 assessed. Ablation of either of the two disulfide bonds had no effect on cell adhesion to ICAM-1  
148 under static conditions (**Figure 3 – figure supplement 1**). As Mac-1 and ICAM-1 interact under  
149 shear forces in flowing blood to mediate neutrophil adhesion and crawling on the endothelium,  
150 we assessed Mac-1 binding to ICAM-1 under fluid shear. Two different states of PDI were  
151 employed in the assays; one where both active site cysteines were fully reduced (reduced PDI)  
152 and another where the active site cysteines were fully oxidized (oxidized PDI). BHK cells  
153 expressing wild-type Mac-1 were untreated or incubated with the different PDI forms before  
154 perfusing over ICAM-1-coated channels and left to adhere. Non-adherent cells were removed  
155 by perfusion of buffer at low shear force of 0.175 dynes/cm<sup>2</sup>. De-adhesion of bound cells was  
156 then triggered by doubling the shear force every minute until it reached 11.2 dynes/cm<sup>2</sup>. The  
157 number of cells remaining adhered at each shear force was measured (**Figure 3B**) and  
158 expressed as a percentage of the total adherent cells at 0.175 dynes/cm<sup>2</sup>. The area under the  
159 curve of the adherent cells as a function of shear force was calculated. Reduced but not  
160 oxidized PDI promoted de-adhesion of wild-type Mac-1 expressing cells from ICAM-1 (**Figure**  
161 **3C**). The data was fit to a one phase exponential decay model by nonlinear regression to  
162 determine the decay constant ( $K$ , cm<sup>2</sup> dynes<sup>-1</sup>) and shear force ( $F_{50}$ , dynes/cm<sup>2</sup>) at which 50% of  
163 the cells were de-adhered from ICAM-1 (**Table 1**). The  $F_{50}$  for wild-type Mac-1 expressing cells  
164 treated with reduced PDI is 0.7299 dynes/cm<sup>2</sup>, which is approximately half of the  $F_{50}$  for cells  
165 treated with oxidized PDI or PBS vehicle. In other words, wild-type Mac-1 expressing cells  
166 require half the shear force to detach from ICAM-1 in the presence of reduced PDI compared to  
167 those in the presence of oxidized PDI. This result indicates that the disulfide-cleaving activity of  
168 PDI, but not its oxidizing activity, promotes Mac-1 de-adhesion from ICAM-1.

169 To further define whether PDI promotes shear-dependent Mac-1 de-adhesion from ICAM-1 by  
170 cleavage of the two  $\beta 2$  disulfide bonds, we subjected BHK cells expressing wild-type Mac-1 or  
171 disulfide mutant Mac-1 to the same cell de-adhesion assays. Ablation of the C224-C264  
172 disulfide bond but not the C169-C176 bond enhanced the shear-dependent de-adhesion of cells  
173 from ICAM-1 (**Figure 3D and E**).  $F_{50}$  for cells expressing C224,264S Mac-1 is 0.3392  
174 dynes/cm<sup>2</sup>, which is approximately one quarter of the  $F_{50}$  for cells expressing wild-type Mac-1  
175 (**Table 1**). This value is half of the  $F_{50}$  for Mac-1 expressing cells treated with reduced PDI. The  
176 difference is possibly due to incomplete PDI cleavage of the C224-C264 disulfide bond in cell  
177 surface Mac-1. This finding indicates that PDI cleavage of the C224-C264 disulfide bond is  
178 important for Mac-1 dis-engagement from ICAM-1 under shear force.

179 The Mac-1 subpopulation reported to mediate ICAM-1 interaction in activated neutrophils has  
180 also been shown to bind fibrinogen (Diamond and Springer, 1993a). To characterize if PDI  
181 cleavage of  $\beta 2$  disulfide bonds promotes de-adhesion of Mac-1 from fibrinogen, we subjected  
182 BHK cells expressing wild-type or disulfide mutant Mac-1 to de-adhesion assays using  
183 fibrinogen-coated channels. Ablation of one or both  $\beta 2$  disulfide bonds had no significant effect  
184 on Mac-1 dis-engagement from fibrinogen when compared to wild-type Mac-1 (**Figure 3 –**  
185 **figure supplement 2**). This result indicates that PDI control of Mac-1 de-adhesion is selective  
186 for interaction with ICAM-1 under shear condition.

187 Integrin affinity for ligand is directly related to its conformations (Chen et al., 2010; Diamond and  
188 Springer, 1993b). Mac-1 transitions from bent closed conformation to open extended  
189 conformations that correlate with transition from low- to high-affinity state for ligand  
190 engagement. Intermediate extended closed conformations have also been observed in  
191 leukocyte integrins (Fan et al., 2019) (**Figure 4A**).

192

### 193 **Ablation of the C224-C264 disulfide bond favors a lower affinity state of Mac-1**

194 To investigate how ablation of the  $\beta 2$   $\beta 1$  domain C224-C264 disulfide bond influences Mac-1  
195 conformations and affinity states, we employed conformation reporting antibodies and flow  
196 cytometry to probe the distribution of conformations of wild-type and disulfide mutant Mac-1  
197 expressed on BHK cells.

198 Total Mac-1 expression on BHK cells was determined using the H52 monoclonal antibody that  
199 recognizes an epitope in the hybrid domain (residues 386-400) of the  $\beta 2$  subunit (Al-Shamkhani  
200 and Law, 1998) and is accessible in all Mac-1 conformations (**Figure 4 – figure supplement 1**).  
201 The monoclonal antibody, MEM48, recognizes the EGF3 domain (residues 534-543) of  $\beta 2$   
202 integrin that is only exposed when Mac-1 is extended (Sen and Springer, 2016). The  
203 monoclonal antibody, CBRM1/5, recognizes an epitope in the  $\alpha M$  I domain (P147, H148, R151,  
204 K200, T203, L206) that becomes exposed in the fully extended open conformation (Oxvig et al.,  
205 1999). The ratio of CD11b+ to CD18+ cells for cells expressing wild-type, C224,264S and  
206 C224,264S and C169,176S mutant Mac-1 ranges from 0.8 to 1.1 indicating comparable  
207 expression of the receptor forms (**Supplementary File 1 Table S3**). For the C169,176S Mac-1  
208 mutant, the ratio is 1.5-1.7 and the number of H52+ cells were normalized according to the  
209 CD11b+ to CD18+ ratio. There was no significant difference in the distribution of bent (10-30%),  
210 extended and closed (20-40%), and extended open (50-60%) conformations in cells expressing  
211 wild-type, C169,176S mutant, and C224,264S and C169,176S double mutant Mac-1 (**Figure**  
212 **4B**). In contrast, there was a shift of conformations from extended open (20%) to predominately

213 extended closed (70%) in cells expressing C224,264S mutant Mac-1. In other words, the  
214 ablation of the C224-C264 bond altered Mac-1 conformation to favor a lower affinity state for  
215 ligand binding.

216 To elucidate how the  $\beta 2$   $\beta I$  C224-C264 bond could influence ligand affinity, we conducted MD  
217 simulations of the effect of C169-C176 and C224-C264 redox state on the conformational  
218 dynamics of the  $\beta I$  domain in complex with the  $\beta$ -propeller (**Figure 5A**).

219

## 220 **Cleavage of the C224-C264 bond perturbs inter-residue contact and mechanical stress in** 221 **the $\beta I$ domain of the $\beta 2$ -integrin**

222 As the structure of Mac-1 has not yet been determined, we took initial atomic positions from the  
223 X-ray structure of the highly close homolog, LFA-1 ( $\alpha L\beta 2$ , CD11a/CD18) (Sen and Springer,  
224 2016). LFA-1 has an identical  $\beta I$  domain and highly similar  $\beta$ -propeller to Mac-1 (**Figure 5A**).  
225 The dynamics of the complex was monitored in multiple molecular dynamics simulation replicas  
226 and for different redox states of the C169-C176 and C224-C264 disulfide bonds. During the  
227 simulations, the complex was found to be very stable, with a backbone root mean square  
228 deviation from the initial positions smaller than 0.45 nm. Inside the  $\beta I$  domain, the loop  
229 connecting the strands B2 and B3 ( $L_{B2-B3}$ ) displayed the largest conformational variations,  
230 although the redox state of the bonds of interest did not favor any preferential position of this  
231 loop (**Figure 5B**). We also analyzed the change in residue-residue contacts induced by  
232 reduction of either disulfide bond (**Figure 5C** and **Figure 5 – figure supplement 1**). Reduction  
233 of C224-C264 altered the contact probability of more residue pairs than reduction of C169-C176  
234 did. Reduction of C169-C176 bond resulted in perturbations nearby the disulfide, while  
235 perturbations extended to other regions of  $\beta I$  when the C224-C264 bond was reduced.  
236 Reduction of both bonds at the same time showed a different perturbation pattern, with changes  
237 in the contact probability close to both affected bonds but not in the region between them. In  
238 addition, we examined how disulfide bond reduction altered the internal mechanical stress of the  
239 protein. To this end, we computed changes in the residue-residue pair-wise forces (**Figure 5D**  
240 and **Figure 5 – figure supplement 1**). Consistent with the residue-residue contacts, the pair-  
241 wise force pattern changed much more drastically upon reduction of C224-C264 than reduction  
242 of C169-C176, or after reduction of both bonds. Moderate changes in the internal mechanical  
243 stress propagate beyond the  $\beta I$  domain, even reaching the  $\beta$ -propeller, while more pronounced  
244 differences occurred mainly in the  $\beta I$  domain (compare the situation for moderate changes,  
245  $z > 0.5$ , with that for large changes,  $z > 0.75$  and  $z > 1.0$ , in **Figure 5 – figure supplement 1**).

246 The question arises how this allosteric effect originating from C224-C264 reduction impacts the  
247 complex structurally. Calculation of the root mean square fluctuation (RMSF) also displayed  
248 changes in the dynamics of several residues distant to C224-C264, even close to C169-C176  
249 (**Figure 5E**). In addition, the solvent accessible surface area (SASA) of  $\beta I$  was found to shift  
250 towards larger areas when the C224-C264 bond was reduced, but not in the other situations  
251 (**Figure 5F**). This increment in SASA is attributed to a more exposed surface area of the region  
252 R2 near C224-C264 rather than the distant region R1 for which changed connectivity and stress  
253 was also observed (compare regions R2 and R1 in **Figure 5F**). In summary, our MD simulations  
254 demonstrate that reduction of the C224-C246 bond, and to a minor extent the reduction of  
255 C169-C176 or both, allosterically alters the internal connectivity and mechanical stress and  
256 modulates the surface area of  $\beta I$ .

257 To demonstrate how PDI and force are essential to regulate neutrophils de-adhesion from  
258 ICAM-1, we measured neutrophil crawling as a function of cell adhesion and de-adhesion  
259 events under fluid shear.

260

### 261 **PDI promotes neutrophil crawling in the direction of flow**

262 Neutrophils express two integrins, LFA-1 and Mac-1, that both interact with ICAM-1. Genetic  
263 knockout of PDI from neutrophils, however, only impairs Mac-1 function but not LFA-1 (Hahm et  
264 al., 2013). It was recently reported that Mac-1 is essential for neutrophil migration in the  
265 direction of flow while LFA-1 mediates movement against flow when Mac-1 is inhibited by  
266 function blocking antibodies (Buffone et al., 2019). To determine how PDI cleavage of Mac-1  
267 disulfide bond influences neutrophil migration, neutrophils were treated with control oxidized or  
268 active reduced PDI, stimulated with fMLF and perfused over an ICAM-1 coated surface.  
269 Adhered neutrophils were then subjected to 0.7 or 5.6 dynes/cm<sup>2</sup> fluid shear and cell tracks  
270 measured (**Figure 6A**). Displacement of neutrophils in X and Y directions from their initial  
271 position was determined (**Figure 6 – figure supplement 1; Supplementary Videos 1-4**) and  
272 expressed as migration index, which is defined as the ratio of the difference between the initial  
273 and final X- or Y-displacement over the total distance travelled by a neutrophil. Positive values  
274 for migration index in the X-direction indicate cell displacement with flow while negative values  
275 indicate cell displacement against flow. Zero indicates no preferred direction. When subjected to  
276 0.7 dynes/cm<sup>2</sup> fluid shear, neutrophils treated with control oxidized or active reduced PDI show  
277 no significant difference in their migration in the X-direction (**Figure 6B**). In other words, PDI  
278 had no effect on neutrophil migration with or against flow at 0.7 dynes/cm<sup>2</sup>. Percentage of  
279 neutrophils migrating in the direction of flow at 0.7 dynes/cm<sup>2</sup> was 32% for cells treated with  
280 oxidized PDI and 42% for cells treated with reduced PDI (**Figure 6 – figure supplement 2;**  
281 **Supplementary File 1 Table S4**). In contrast, when subjected to 5.6 dynes/cm<sup>2</sup> fluid shear,  
282 there was a significant increase of neutrophils migrating in the direction of flow when treated  
283 with reduced PDI when compared to neutrophils treated with control oxidized PDI (**Figure 6B**).  
284 Percentage of neutrophils migrating in the direction of flow at 5.6 dynes/cm<sup>2</sup> was 42% for cells  
285 treated with oxidized PDI and increased to 70% for cells treated with reduced PDI (**Figure 6 –**  
286 **figure supplement 2; Supplementary File 1 Table S4**). Displacement of neutrophils in the Y-  
287 direction which is perpendicular to the direction of flow was also determined (**Figure 6C**).  
288 Neutrophils treated with oxidized or reduced PDI had no significant difference in their migration  
289 in the Y-direction, indicating that PDI has no effect on neutrophil movement in the direction  
290 perpendicular to fluid shear.

291 Crawling speed of neutrophils treated with control oxidized or reduced PDI was also determined  
292 by measuring the total distance traveled by each neutrophil and dividing it by the total time of  
293 migration. Neutrophils treated with reduced PDI exhibited significantly slower crawling speeds at  
294 0.7 and 5.6 dynes/cm<sup>2</sup> fluid shear compared to neutrophils treated with control oxidized PDI  
295 (**Figure 6D**), and the speeds were comparable at both shear force (**Supplementary File 1**  
296 **Table S5**). This result indicates that PDI-mediated decrease in crawling speed of neutrophils  
297 treated with is independent of shear force.

298 Together, our data indicates that reduced PDI but not control oxidized PDI slows down  
299 neutrophil crawling under shear force and promotes migration in the direction of flow.

300

## 301 Discussion

302 We describe here a mechano-redox event controlling the function of Mac-1 on the trailing edge  
303 of neutrophils. PDI in the presence of fluid shear from 0.17-11 dynes/cm<sup>2</sup> selectively regulates  
304 Mac-1 de-adhesion from endothelial ICAM-1 by cleaving the C224-C264 allosteric disulfide  
305 bond in the  $\beta 2$   $\beta 1$  domain (**Figure 7A**). Cleavage of this bond induces mechanical stress in the  
306  $\beta 1$  domain and allosterically perturbs residue contacts between the  $\beta 1$  and  $\beta$ -propeller domains.  
307 We suggest that this conformational change in Mac-1 results in suboptimal binding to ICAM-1  
308 that leads to detachment of ICAM-1 in the fluid shear encountered in the circulation. As a  
309 consequence of Mac-1 de-adhesion at the trailing edge of the cell, PDI promotes neutrophil  
310 migration in the direction of flow.

311 Leukocyte integrins, LFA-1 and Mac-1, are major integrins that interact with endothelial ICAM-1  
312 to mediate cell motility. In T-cells and hemopoietic stem cells, the predominant expression of  
313 LFA-1 enables these cells to migrate on the endothelium against the direction of flow (Buffone  
314 et al., 2018). However, in neutrophils which express both LFA-1 and Mac-1, cells migrate only in  
315 the direction of flow. Mac-1 expression is the key determinant for neutrophil directional migration  
316 since inhibition of Mac-1 by function-blocking antibodies results in neutrophil migration against  
317 flow (Buffone et al., 2019). How Mac-1 mediates neutrophil movement with flow has been  
318 elusive. In a crawling neutrophil, LFA-1 localizes in the trailing edge while Mac-1 localizes in  
319 both the trailing edge and in the middle of the cell (Hyun et al., 2019). By measuring separation  
320 of the cytoplasmic tails of  $\alpha$  and  $\beta$  subunits using fluorescence resonance energy transfer, LFA-  
321 1 is found to adopt a high affinity state when bound to ICAM-1 in a moving neutrophil whereas  
322 Mac-1 adopts a lower affinity state (Hyun et al., 2019). The results described herein indicate that  
323 the lower affinity of Mac-1 for ICAM-1 in a moving neutrophil can be attributed to PDI cleavage  
324 of the Mac-1 C224-C264 disulfide bond that leads to shift in Mac-1 conformation from extended  
325 open to extended closed state. Our colocalization data indicates that PDI selectively targets  
326 Mac-1 clusters at the trailing edge of neutrophils. It has been suggested that the uropod senses  
327 the direction of flow via the trailing edge, which is less adherent and therefore more susceptible  
328 to shear force (Valignat et al., 2014). Our findings provide a molecular mechanism for neutrophil  
329 detachment at the trailing edge that enables sensing of directional flow. Shear-dependent PDI  
330 cleavage of the Mac-1 C224-C264 allosteric disulfide bond spatially regulates Mac-1 affinity at  
331 the trailing edge to drive neutrophil movement in the direction of flow.

332 We also observed PDI-dependent reduction in the crawling speed of neutrophils that was  
333 independent of shear force. Disruption of binding of Mac-1 to ICAM-1 by Mac-1 blocking  
334 antibodies reduces the crawling speed of neutrophils *in vitro* and *in vivo* (Volmering et al., 2016)  
335 (Li et al., 2018), which is consistent with our observations. That is, PDI cleavage of the Mac-1  
336 C224-C264 disulfide bond phenocopies Mac-1 function blocking antibodies in disrupting Mac-1  
337 adhesion to ICAM-1. It has been reported that proteases released from the uropod mediate  
338 neutrophil detachment under static conditions by degrading surface Mac-1 (Singh et al., 2012).  
339 In our studies, PDI has no effect on Mac-1 adhesion to ICAM-1 in static conditions, which  
340 suggests there may be separate mechanisms regulating neutrophil migration under static  
341 versus shear conditions.

342 We previously reported that platelet surface thiol isomerase ERp5 cleaves the  $\beta 1$  domain C177-  
343 C184 disulfide bond in the  $\beta 3$  subunit of platelet  $\alpha IIb\beta 3$  and this cleavage changed the positions  
344 of residues critical for metal ion coordination resulting in release of fibrinogen. The  $\beta 2$  subunit  
345 C169-C176 disulfide bond in Mac-1 is homologous to the  $\beta 3$  subunit C177-C184 disulfide bond



346 **(Figure 7B)** and is close to the metal ion binding sites and  $\alpha$ M I (or  $\alpha$ I) domain involved in  
347 ICAM-1 binding. We, therefore, anticipated that the redox state of this bond would be a critical  
348 determinant of binding of Mac-1 to ICAM-1. Although our mass spectrometry analysis showed  
349 that PDI cleaves both  $\beta$ I-domain disulfide bonds equally well, our functional data supports that  
350 only the C224-C264 disulfide bond controls Mac-1 affinity for ICAM-1 in fluid shear. This finding  
351 is surprising since the C224-C264 disulfide bond is distant from known epitopes in the  $\alpha$ I,  $\beta$ -  
352 propeller and  $\beta$ I domain essential for ICAM-1 interaction (Bajt et al., 1995; Chen et al., 2010;  
353 Diamond et al., 1991; Oxvig et al., 1999; Sen and Springer, 2016; Sen et al., 2013; Shimaoka et  
354 al., 2003; Yang et al., 2004). Our data using conformation reporting antibodies revealed that the  
355 redox state of the C224-C264 disulfide bond controls exposure of critical residues (P147, H148,  
356 R151, K200, T203, L206) in the  $\alpha$ I domain required to form a fully open ligand binding pocket for  
357 high affinity ICAM-1 binding. This finding indicates that the C224-C264 disulfide bond influences  
358 the  $\alpha$ I domain in an allosteric manner. Indeed, our MD simulations showed that cleavage of the  
359 C224-C264 disulfide bond perturbs contacts of both neighboring and distal residues thus  
360 supporting an allosteric mechanism of control.

361 Unlike LFA-1 which readily interacts with ICAM-1 regardless of its conformation state, Mac-1  
362 only binds to ICAM-1 in its fully open extended conformation (Li et al., 2013). This suggests that  
363  $\alpha$ I domain alone may be insufficient for high affinity binding of Mac-1 to ICAM-1 but requires  
364 contact from the  $\beta$ I domain. Mutations identified in the deleterious genetic disease, Leukocyte  
365 Adhesion Deficiency Type I (LAD-1), support this hypothesis. Mis-sense mutations for a number  
366 of residues in R2 region can lead to LAD-1 (van de Vijver et al., 2012). One of the most  
367 common LAD-1 alleles is G284S (or G262S in the mature  $\beta$ 2 integrin) that is two residues from  
368 C264. G284 (or G262) is precisely at the region that displayed the largest change in area  
369 exposed upon reduction of the C224-C264 disulfide bond. Expression of Mac-1 containing the  
370 G284S mutation in CHO cells resulted in reduced Mac-1 expression while a G284R (or G262R)  
371 mutation was associated with impaired ICAM-1 binding (Mathew et al., 2000; Uzel et al., 2008).  
372 These findings support our conclusion that residues influenced by the redox state of the C224-  
373 C264 disulfide bond are important for ICAM-1 binding.

374 Mechano-redox regulation of Mac-1 by PDI controls ICAM-1 but not that of fibrinogen binding.  
375 Among the integrin family, Mac-1 is considered the most promiscuous that can bind to over 30  
376 extracellular ligands (Hyun et al., 2009). Distinct epitopes in Mac-1 have been identified to be  
377 important for binding to specific ligands (Diamond et al., 1993). For example, a motif in the  $\alpha$ I  
378 domain M7 (E162-L170) specifically interacts with the inflammatory ligand CD40L. Inhibitory  
379 anti-M7 antibody blocks Mac-1 binding to CD40L but has no effect on binding to ICAM-1 or  
380 fibrinogen (Wolf et al., 2018). On the other hand, the  $\alpha$ I domain epitopes for ICAM-1 and  
381 fibrinogen binding are overlapping as demonstrated by blocking of Mac-1 adhesion to both  
382 ICAM-1 and fibrinogen by anti- $\alpha$ M CBRM1/5 antibody (Diamond and Springer, 1993a). PDI,  
383 therefore, selectively controls Mac-1 promiscuity. Notably, the  $\beta$ I-domain C169-C176 and C224-  
384 C264 disulfide bonds are conserved in 7 of the 8  $\beta$  integrins (**Figure 7B**) suggesting that other  $\beta$   
385 integrins might be also subject to mechano-redox regulation.

386 In conclusion, we have identified a mechano-redox mechanism that selectively controls Mac-1  
387 binding to ICAM-1 in fluid shear conditions. This mechanism allows the trailing edge of  
388 neutrophils to detach from ICAM-1 and enables movement in the direction of flow. Importantly,  
389 this informs studies on the development and optimization of PDI inhibitors as therapeutic agents  
390 to attenuate neutrophil migration to subdue inflammation.

391

## 392 **Materials and Methods**

### 393 **Neutrophil Isolation**

394 All procedures involving human whole-blood were collected from healthy human volunteers in  
395 accordance with the Human Research Ethics Committee of the University of Sydney (2014/244)  
396 and the declaration of Helsinki. Human whole-blood was collected from healthy human  
397 volunteers into plastic syringes containing Clexane at 20 U/mL (Sanofi). Neutrophils were  
398 isolated from human whole-blood by Histopaque density gradient centrifugation. A 48 mL  
399 density gradient was created by layering Histopaque-1077 on top of Histopaque-1191 (Sigma-  
400 Aldrich), followed by a layer of whole blood at a volumetric ratio of 2:1:1 in a 50 mL conical  
401 centrifuge tube at 25°C. The tube was centrifuged at 600 G for 20 min with no brake, and the  
402 pink neutrophil buffy coat that formed above the red blood cell layer was collected, diluted in  
403 Hank's Buffered Salt Solution (HBSS, 1 mM CaCl<sub>2</sub>, 1 mM MgCl<sub>2</sub>, 5.4 mM KCl, 0.44 mM  
404 KH<sub>2</sub>PO<sub>4</sub>, 136.9 mM NaCl, 0.34 mM Na<sub>2</sub>HPO<sub>4</sub>, 5.5 mM D-glucose, 0.5% (w/v) BSA, pH 7.2), and  
405 centrifuged at 600 G for 5 min. The cell pellet was then resuspended in HBSS and cleared of  
406 red blood cells by lysis in ice cold 0.2% (w/v) NaCl for 20 secs, neutralized with an equivalent  
407 volume of 1.6% (w/v) NaCl and centrifuged at 250 g, 4°C for 6 min. This process was repeated  
408 up to 2 times until all red blood cells were cleared. Neutrophils were stored at 4°C, brought up to  
409 25°C prior to use in assays, and used within 4 h of blood collection.

410

### 411 **Colocalization of Mac-1 and PDI on neutrophils**

412 For colocalization of Mac-1 and PDI under static conditions, wells of an 8-well microslide were  
413 coated with 10 µg/mL of ICAM-1/Fc (R&D systems) for 2 h at room temperature, washed with  
414 PBS and blocked with 0.5% (w/v) BSA for 30 min. After a final wash, neutrophils (1x10<sup>6</sup>  
415 cells/mL) were added to each well in the presence of APC conjugated anti-CD11b antibody  
416 CBRM1/5 (BioLegend) at 1 µg/mL, anti-PDI antibody DL11 (Sigma-Aldrich) at 2 µg/mL, and  
417 Alexa Fluor 488 conjugated goat anti-rabbit IgG (Thermofisher) at 2 µg/mL. Neutrophils were  
418 added to the wells without or with 10 µM of fMLF and left to adhere for 30 min at 37°C. After  
419 incubation, neutrophils were fixed with 4% (w/v) PFA for 1 h, washed with PBS, and covered  
420 with ProLong gold Antifade reagent (Thermofisher) according to manufacturer's instructions  
421 before imaged on a Zeiss LSM880 confocal microscope with a 63x oil objective (NA 1.4).

422 For colocalization of Mac-1 and PDI under fluid shear, neutrophils were incubated with 1 µg/mL  
423 of an APC-conjugated anti-CD11b CBRM1/5 and 2 µg/mL of the rabbit anti-PDI DL-11 for 1 h on  
424 ice. Neutrophils were then washed and stained with 0.5 µg/mL of an Alexa Fluor 488-  
425 conjugated goat anti-rabbit IgG for 1 h on ice. After a final wash with Hank's buffered saline  
426 solution, neutrophils were primed with 1 µM of fMLF, perfused through microfluidic devices  
427 coated with 10 µg/mL of ICAM-1/Fc, and left to settle for 5 min. Neutrophils were then exposed  
428 to 0.7 dynes/cm<sup>2</sup> (100 s<sup>-1</sup>) or 5.6 dynes/cm<sup>2</sup> (800 s<sup>-1</sup>) of shear by perfusing Hank's buffered  
429 saline solution containing 5 µM of fMLF and imaged using a 63x oil objective (1.4 NA) on a  
430 Zeiss LSM880 confocal microscope.

431 Colocalization was analyzed using ImageJ. Regions of interest were drawn around the trailing  
432 and leading edge of crawling neutrophils, and the Coloc2 plugin was used to calculate the  
433 Pearson's correlation coefficient and Mander's coefficients.

434

### 435 **Redox state of disulfide bonds in $\beta_2$ integrin**

436 Recombinant redox active and redox inactive PDI were produced from *E.coli* as described  
437 (Passam et al., 2018). PDI was reduced by incubating with 10 mM DTT for 30 min at 25°C prior  
438 use. Reduced PDI was then desalted to remove DTT using 7K MWCO Zebaspin columns  
439 (ThermoFisher). 2  $\mu$ g of recombinant Mac-1 integrin (R&D systems) was incubated with reduced  
440 PDI or enzymatically inactive PDI at 10  $\mu$ M for 30 min at 25°C. Reduced cysteines were then  
441 alkylated with  $^{12}$ C-IPA (Cambridge Isotopes) at 4 mM, 10% DMSO, for 1 h at 25°C. The  $\alpha$ M and  
442  $\beta_2$  subunits of recombinant Mac-1 integrin were resolved on 4-20% polyacrylamide (BioRad),  
443 gradient gels by SDS-PAGE and stained with Coomassie brilliant blue R250. The bands  
444 corresponding to the  $\alpha$ M and  $\beta_2$  subunits were excised from the gels, destained, dried, and  
445 incubated with DTT at 40 mM for 30 min at 56°C and washed. The fully reduced protein was  
446 then alkylated with  $^{13}$ C-IPA at 4 mM in 10% DMSO, for 1 h at 25°C. The gel slices were washed  
447 and deglycosylated with 5 units of PNGase F (Sigma-Aldrich) overnight at 37°C. The proteins  
448 were digested with 12.5 ng/ $\mu$ L of chymotrypsin in 25 mM  $\text{NH}_4\text{HCO}_3$ , 10 mM  $\text{CaCl}_2$  for 4 h at  
449 37°C, followed by digestion with 12.5 ng/mL trypsin in 25 mM  $\text{NH}_4\text{HCO}_3$  overnight at 25°C.  
450 Peptides were eluted twice from the gel pieces with formic acid 5% v/v in acetonitrile 50% v/v.  
451 Liquid chromatography, mass spectrometry and data analysis were performed as previously  
452 described (Chiu, 2019). Briefly, peptides were analyzed on a Thermo Fisher Scientific Ultimate  
453 3000. Two hundred ng of peptides was injected and resolved on a 35 cm  $\times$  75  $\mu$ m C18 reverse  
454 phase analytical column with integrated emitter using a 2-35% acetonitrile over 20 min with a  
455 flow rate of 250 nl/min. The peptides were ionized by electrospray ionization at +2.0 kV.  
456 Tandem mass spectrometry analysis was carried out on a Q-Exactive Plus mass spectrometer  
457 using HCD fragmentation. The data-dependent acquisition method acquired MS/MS spectra of  
458 the top 10 most abundant ions with charged state  $\geq 2$  at any one point during the gradient.  
459 MS/MS spectra were searched against the Swissprot reference proteome using Mascot search  
460 engine (Version 2.7, Matrix Science) or against human ITGB2 protein sequence using Byonic<sup>TM</sup>  
461 (Version 3.0, Protein Metrics). Precursor mass tolerance and fragment tolerance were set at 10  
462 ppm and the precursor ion charge state to 2+, 3+ and 4+. Variable modifications were defined  
463 as oxidized Met, deamidated Asn/Gln, N-terminal pyro Glu/Gln, iodoacetanilide derivative Cys  
464 and iodoacetanilide- $^{13}$ C derivative Cys with full trypsin and chymotrypsin cleavage of up to  
465 three missed cleavages. Only peptides with a peptide score  $>30$  ( $p < 0.05$ ) and error  $< 6$  ppm  
466 were selected for quantification of relative abundance (**Supplementary File 1 Table S2**).  
467 Relative ion abundance of peptides labelled with  $^{12}$ C-IPA and/or  $^{13}$ C-IPA in extracted ion  
468 chromatograms generated using XCalibur Qual Browser software (Thermo Fisher Scientific,  
469 Waltham, Massachusetts, v2.1.0). The redox state of cysteine was calculated as a percentage  
470 of the abundance of  $^{12}$ C-IPA labelled peptide of the total sum of abundance of  $^{12}$ C-IPA and  $^{13}$ -  
471 IPA labelled peptide.

472 The mass spectrometry proteomics data have been deposited to the ProteomeXchange  
473 Consortium via the PRIDE (Perez-Riverol et al., 2022) partner repository with the dataset

474 identifier PXD032688. The dataset is currently private but is accessible using the following login  
475 details at <https://www.ebi.ac.uk/pride/login>.

476 Username: reviewer\_pxd032688@ebi.ac.uk

477 Password: F828dFcq

478

#### 479 **Recombinant expression of Mac-1 on BHK cells**

480 cDNA constructs for expression of recombinant Mac-1 in mammalian cells were generated by  
481 GenScript. *ITGAM* cDNA was cloned into the vector pcDNA3.1/HygroB(+). Wild type (WT)  
482 *ITGB2* cDNA or Cys to Ser mutant DNA (C169SC176S, C224SC264S, or both) was cloned into  
483 the vector pcDNA3.1/Neo(+). cDNA was cloned using the restriction enzyme sites HindIII and  
484 XbaI.

485 *ITGAM* and *ITGB2* cDNA constructs were linearized with restriction enzymes SspI and FspI  
486 (New England Biolabs) respectively and were cotransfected into BHK cells using Lipofectamine  
487 2000 (ThermoFisher) according to manufacturer's protocol. Stably transfected cells were  
488 selected by culturing in media containing hygromycin B and G418 (ThermoFisher); cells were  
489 cultured in DMEM supplemented with L-glutamine at 2 mM, 10% v/v fetal calf serum,  
490 hygromycin B at 500 µg/mL, and G418 at 500 µg/mL. Anti-CD18 antibody H52 (Developmental  
491 Studies Hybridoma Bank) was conjugated with Alexa Fluor 488 using Alexa Fluor 488 protein  
492 labeling kit (ThermoFisher) as described by manufacturer's instruction. Expression of Mac-1 in  
493 transfected BHK cells was then measured by incubating cells with 10 µg/mL of Alexa Fluor 488  
494 conjugated anti-CD18 antibody H52 or APC conjugated anti-CD11b antibody OKM1 (Boster  
495 Biological Technology) at 5 µg/mL for 30 min at 25°C, washed, and analyzed by flow cytometry  
496 on a BD Accuri C6. Expression was determined by comparing with stained vector BHK cell  
497 transfects.

498

#### 499 **Static BHK adhesion assays**

500 Wells of a 96-well plate were coated with 10 µg/mL of ICAM-1/Fc at 4°C for 16 h. Wells were  
501 then washed with PBS and blocked with 1% w/v polyvinylpyrrolidone for 2 h at room  
502 temperature, followed by washing with PBS. 100 µL of BHK cells at 1x10<sup>6</sup> cells/mL, expressing  
503 wild type Mac-1 or disulfide mutants, was then added to each well and left to adhere for 2 h at  
504 37°C. After 3 gentle wash steps with PBS, 100 µL of 1 µg/mL calcein AM was added to each  
505 well and left to stain for 30 min at 37°C. The fluorescence of each well was then measured at  
506 488/520 nm ex/em on a Tecan M1000 plate reader.

507

#### 508 **Cell de-adhesion assay under flow**

509 Microfluidic devices were produced from PDMS (Dow Corning) and assembled as previously  
510 described (Dupuy et al., 2019). Microfluidic devices were coated with 10 µg/mL ICAM-1/Fc for 5  
511 h at 25°C. Devices were then blocked with BSA (1% w/v) for 1 h, then washed with PBS.  
512 Recombinant PDI purified from *E. coli* was either reduced with 10 mM DTT in PBS for 30 min at  
513 25°C or oxidized by 200 µM oxidized glutathione (GSSG) in PBS for 16 h at 25°C. PDI was

514 desalted into PBS using zeba desalting columns. BHK cells ( $1 \times 10^6$  cells/mL) were stained with  
515 calcein AM (ThermoFisher) at  $1 \mu\text{g/mL}$ , perfused without or with  $1 \mu\text{M}$  PDI (reduced or oxidized)  
516 through microfluidic devices and left to settle and adhere to surfaces at  $25^\circ\text{C}$  for 15 min.  
517 Devices were then perfused with PBS for 1 min at a shear stress of  $0.175 \text{ dynes/cm}^2$  ( $25 \text{ s}^{-1}$ ) to  
518 wash off non-adherent cells. Tile scan images were taken on a Zeiss LSM 880 confocal  
519 microscope and the shear force was doubled every min until  $11.2 \text{ dynes/cm}^2$  ( $1600 \text{ s}^{-1}$ ) was  
520 reached. Adherent cells were then quantified and normalized to the number of cells adherent at  
521  $0.175 \text{ dynes/cm}^2$ .

522 The area under each curve was calculated in GraphPad Prism 9. Data was also best fitted using  
523 nonlinear regression for one phase exponential decay in GraphPad Prism 9 to calculate the  
524 decay constant ( $K$ ,  $\text{cm}^2 \text{ dynes}^{-1}$ ) and shear force ( $F_{50}$ ,  $\text{dynes/cm}^2$ ) at which 50% of BHK cells  
525 were de-adhered from ICAM-1.

526

### 527 **Detection of Mac-1 conformation states**

528 Mac-1 expressing BHK cells ( $1 \times 10^5$  cells) in PBS containing  $1 \text{ mM}$   $\text{CaCl}_2$  and  $1 \text{ mM}$   $\text{MgCl}_2$  were  
529 stained separately with either FITC-conjugated anti-CD18 antibody MEM48 (ThermoFisher) at  
530 1:100 dilution or APC-conjugated CBRM1/5 at  $0.5 \mu\text{g/mL}$ , washed, and measured by flow  
531 cytometry. Cells were stained with conformation non-specific Alexa Fluor 488 conjugated H52 at  
532  $10 \mu\text{g/mL}$  as a control for Mac-1 expression. Binding of antibodies was calculated as a  
533 percentage shift from staining of BHK cells transfected with vector alone. The number of H52+  
534 cells were normalized to the expression ratio of CD11b+ cells (OKM1+) and CD18+ cells  
535 (H52+). The distribution of cells in each of the Mac-1 conformations was determined as follows:  
536 % Extended open = [% CBRM1/5+ cells]; % Extended closed = [% MEM48+ cells] – [%  
537 CBRM1/5+ cells]; % Bent = [% H52+ cells] – [% MEM48+ cells]

538

### 539 **Molecular dynamics simulations**

540 Molecular dynamics (MD) simulations of the integrin  $\beta$ -propeller- $\beta$ I complex were carried out.  
541 Initial coordinates of the complex were taken from the X-ray structure of the Leukocyte integrin  
542  $\alpha\text{L}\beta 2$  (PDB id. 5E6U) (Sen and Springer, 2016). Note that the  $\beta$ I domains of Mac-1 and LFA-1  
543 ( $\alpha\text{L}\beta 2$ ) are identical, while the  $\beta$ -propeller units have a 73% sequence similarity (with 41%  
544 residues being identical). The  $\beta$ -propeller consisted of the segments 1–122 and 320–591 of the  
545  $\alpha$  domain sequence, while the  $\beta$ I domain corresponded to the amino acids 101–344 of the  $\beta 2$   
546 sequence. Four situations were considered: (i) with both C169-C176 and C224-C264 disulfide  
547 bonds formed (“wt”), (ii) with C169-C176 bond reduced, (iii) with C224-C264 bond reduced, and  
548 (iv) with both disulfide bonds reduced (“both”). The complex (in any of the four forms) was  
549 inserted in a dodecahedral simulation box and solvated by  $\sim 35165$  water molecules. Four  
550 Calcium and one Magnesium ions were observed to be bound to the protein in the  
551 crystallographic X-ray structure. These ions were considered in the simulation. Surrounding  
552 crystallographic water molecules were also considered. Sodium and Chloride ions were added  
553 at a concentration of approximately  $0.15 \text{ M}$ , with an excess of the earlier to ensure an  
554 electrically neutral system. The system contained  $\sim 116835$  atoms in total.

555 The GROMACS MD package (version 2020.3) was employed (Abraham et al., 2015). The  
556 CHARMM36 force-field was used for the protein, (Best et al., 2012) the CHARMM TIP3P model  
557 for the water molecules, and default CHARMM parameters for the ions. Electrostatic  
558 interactions were computed with the Particle mesh Ewald method (Darden et al., 1995;  
559 Essmann et al., 1995). Short-range non-bonded interactions were modelled with a Lennard-  
560 Jones potential, within a distance of 1.2 nm. Neighbor searching was carried out by using the  
561 Verlet buffer scheme (Pall and Hess, 2013). Bonds involving protein hydrogen atoms were  
562 constrained using the LINCS algorithm (Hess et al., 1998). Both angular and bond stretching  
563 internal motions of water molecules were also constrained by using SETTLE (Miyamoto and  
564 Kollman, 1992). Equations of motion were integrated using the Leap-Frog algorithm at discrete  
565 time steps of 2 fs. Temperature was maintained constant at 310 K by using the Nose-Hoover  
566 thermostat ((Berendsen et al., 1984; Nose, 1884) for the equilibration steps), using a coupling  
567 constant of 1 ps. Pressure was also kept constant at 1 bar by coupling the system to the  
568 isotropic Parrinello-Rahman barostat (coupling constant 5 ps) (Parrinella and Rahman, 1981).

569 Before molecular dynamics, the potential energy of the system was minimized by using the  
570 steepest descent method. Subsequently, the solvent was equilibrated around the protein, during  
571 500 ps at constant volume followed by 1000 ps at constant pressure. During these equilibration  
572 steps the protein was maintained position-restrained (elastic constant of 1000 kJmol<sup>-1</sup>nm<sup>-2</sup>). For  
573 the subsequent production runs the protein restraints were released. N=10 independent  
574 simulation replicas were carried out for each system (n=8 when C169-C176 was reduced). The  
575 simulation length of each replica varied from 400 ns up to 447 ns, for a total cumulative  
576 simulation time of ~4.3 μs (both cysteines oxidized); ~3.4 μs (C169-C176 reduced); ~4.25 μs  
577 (C224-C246) reduced, and ~4.3 μs (both cysteines reduced). The total cumulative simulation  
578 time was ~16.3 μs. From each replica the first 150 ns were accounted as equilibration and thus  
579 discarded from further analysis.

580 Principal component analysis (PCA), consisting of the calculation and diagonalization of the  
581 covariance positional matrix, was carried out to detect global conformational changes of βI  
582 (Amadei et al., 1993). The carbon-alpha atoms of βI were considered for this analysis, after  
583 rigid-body removal of both translation and rotation of the center of mass of the whole complex.  
584 PCA was carried out concatenating the trajectories of all four data sets. Trajectories were then  
585 projected onto the first PCA eigenvector (which accounted for 39% of the total C-alpha  
586 positional fluctuations of βI). Histograms of the projections are presented in the main text.

587 The fraction of simulation time  $C_{i,j}$  in which the residue pair (i,j) was found in contact was  
588 computed using CONAN (Mercadante et al., 2018). A contact was assumed to be established if  
589 the residues came closer than 0.35 nm.  $F_{i,j}$  was obtained separately for the four different data  
590 sets concatenating all replicas corresponding to each set:  $C_{i,j}(wt)$ ,  $C_{i,j}(C169-C176)$ ,  $C_{i,j}(C224-$   
591  $C246)$ , and  $C_{i,j}(both)$ . Accordingly the change in contact probability was quantified as the  
592 difference  $\Delta C_{ij}(X) = C_{i,j}(X) - C_{i,j}(wt)$ , with  $X=C169-C176$ ,  $C224-C246$ , or both. To assess the  
593 statistical significance of the change in contacts  $\Delta C_{ij}(X)$ ,  $C_{ij}$  was computed separately for each  
594 individual replica:  $C_{ij}^r$  (with  $r=1, \dots, N$  replicas with non-negligible  $C_{ij}^r$  values). Only pairs with  $r \geq 5$   
595 were considered for this analysis. The following normalized difference function was computed  
596  $z = [ \langle C_{ij}(X) \rangle_r - \langle C_{ij}(wt) \rangle_r ] / [ \sigma_r^2(C_{ij}(X)) + \sigma_r^2(C_{ij}(wt)) ]^{1/2}$ , with  $\langle \rangle_r$  and  $\sigma_r^2$  denoting average and  
597 standard deviation squared over the  $r$  replicas, respectively. Residue pairs with  $z > 0.5$  were  
598 considered (main text) and the dependency on  $z$  was monitored by setting  $z > 0.25, 0.5, 0.75$ ,

599 and 1 (**Figure 5 – figure supplement 1**). In all cases pairs with non-negligible change were  
600 selected, meaning  $|\Delta C_{ij}| > 0.4\%$  of the total simulation time.

601 The non-bonded pair-wise force  $F_{i,j}$  between the residues  $i$  and  $j$  was extracted from the  
602 simulations by using force distribution analysis (version 2.10.2) (Costescu and Grater, 2013).  
603 Analogously to the change in contacts, pair-wise force differences, with respect to the fully  
604 oxidized system, were computed:  $\Delta F_{ij}(X) = \langle F_{i,j}(X) \rangle - \langle F_{i,j}(wt) \rangle$ , with  $X = C169-C176$ ,  $C224-C246$ ,  
605 or both, and with  $\langle \rangle$  denoting time-average over the concatenated trajectory. Similarly as with  
606 the contacts, the  $z$  normalized difference was determined by computing per-replica time-  
607 averages of the pair-wise forces.  $z > 0.25$ ,  $0.5$ ,  $0.75$ , and  $1$  and  $|\Delta F_{ij}| > 1$  pN threshold values  
608 were applied.

609 The root mean square fluctuation (RMSF) of the atomic positions of each residue was computed  
610 and the following difference was considered for each system:  $\Delta RMSF = RMSF(X) - RMSF(wt)$ ,  
611 with  $X = C169-C176$ ,  $C224-C246$ , or both. The solvent accessible surface area (SASA) of the  $\beta I$   
612 domain and some subregions of it (indicated in the main text) was extracted from the  
613 simulations. Distributions of this quantity for the different systems are presented in the main text.

614 PCA, RMSF, and SASA calculations were carried out with the GROMACS gmx tools (Van Der  
615 Spoel et al., 2005).

616

### 617 **Neutrophil crawling under flow**

618 PDMS microfluidic devices were coated with  $10 \mu\text{g/mL}$  of ICAM-1/Fc for 2 h at room  
619 temperature. Microfluidic devices were blocked with 0.5% BSA for 1 h at room temperature.  
620 Neutrophils ( $1 \times 10^6$  cells/mL) were stained with  $1 \mu\text{g/mL}$  of calcein AM for cell tracking and  
621 primed with  $1 \mu\text{M}$  fMLF. Neutrophils were added onto microfluidic devices, allowed to settle and  
622 adhere for for 5 min. Adherent neutrophils were then exposed to either  $0.7 \text{ dynes/cm}^2$  ( $100\text{s}^{-1}$ )  
623 or  $5.6 \text{ dynes/cm}^2$  ( $800\text{s}^{-1}$ ) of shear by perfusing Hank's buffered saline solution containing  $5 \mu\text{M}$   
624 fMLF. Neutrophil crawling was imaged every second using a 40x oil objective (1.2 NA) on an  
625 Olympus IX81 fluorescent microscope.

626 To measure neutrophil crawling, the centroid of each neutrophil was defined as the cell's  
627 position and was determined by thresholding calcein fluorescence on ImageJ. The cell positions  
628 between each frame were then used to determine displacement. The net displacement was  
629 calculated by the difference of position at the beginning and end of the time as described by  
630 Buffone et al. (Buffone et al., 2018, 2019). Crawling speed ( $\mu\text{m/min}$ ) was calculated from the  
631 total distance traveled by a neutrophil from its initial position as determined by cell tracking and  
632 dividing it by the total time of migration. The migration index in X-direction is defined as the ratio  
633 of the difference between the initial and final X-displacement over the total distance traveled by  
634 a cell  $(X_{\text{end}} - X_{\text{initial}}) / \text{Distance}_{\text{total}}$ . When migration is near 0, there is no preferred direction in cell  
635 migration. When migration index for X-displacement is near -1, it indicates cell migration against  
636 the direction of flow, whereas migration index for X-displacement is near +1, it indicates cell  
637 migration in the direction of flow. The migration index in Y-direction is defined as the ratio of the  
638 difference between the initial and final Y-displacement over the total distance traveled  $(Y_{\text{end}} -$   
639  $Y_{\text{initial}}) / \text{Distance}_{\text{total}}$ . Only single cells that remained in the field of view in the duration of  
640 experiment were analyzed. Dividing cells and clusters of cells were excluded from analysis.

641

## 642 **Modelling of Mac-1**

643 To model an extended and open structure of Mac-1, the  $\beta 2$  integrin from  $\alpha X\beta 2$  (PDB:3K6S) was  
644 structurally aligned to the  $\beta 3$  chain from the open structure of  $\alpha V\beta 3$  (PDB:3IJE) (Xiong et al.,  
645 2009), and a model structure of  $\alpha M$  was built using the  $\alpha X$  structure from PDB:5ES4 (Sen and  
646 Springer, 2016) as a template. Disulfide bond C770-C776 in  $\alpha M$  was manually broken using  
647 PyMOL Molecular Graphics System Version 2.0 Schrödinger, LLC to simulate the opening of  
648 the hinge between calf1 and the thigh domains, and disulfide bond C461-C492 in  $\beta 2$  was  
649 manually broken to simulate the opening of the hinge between EGF1 and EGF2 domains.  
650 Residues 1-770 and 776-1099 from  $\alpha M$  were structurally aligned to the residues 1-600 and 661-  
651 967 respectively in  $\alpha V$  from PDB:3IJE. Residues 1-461 and 469-674 from  $\beta 2$  were structurally  
652 aligned to residues 1-488 and 449-695 respectively in  $\beta 3$ . The extended Mac-1 model was  
653 further refined using Fiberdock server for flexible induced-fit backbone refinement (Mashiach et  
654 al., 2010). The extended model was assessed using Swiss-model assessment server  
655 (Waterhouse et al., 2018). To reduce atom clashes between the two chains, a structural energy  
656 minimization was performed in GROMACS (version 2020.2) using the steepest descent  
657 integrator with CHARMM27 forcefield.

658

## 659 **Statistical analysis**

660 Unless otherwise stated, data were analyzed by two-tailed, paired student's t-test. Multiple data  
661 sets were analyzed with one-way ANOVA, with Dunnett's post-hoc multiple comparisons.

662

## 663 **Data availability statement**

664 The mass spectrometry data is available via ProteomeXchange with the dataset identifier  
665 PXD032688. All other data generated or analyzed are included in the manuscript and  
666 supporting files, and are also available from the corresponding authors.

667

## 668 **Acknowledgements**

669 The authors thank Profs Bruce Furie and Robert Flaumenhaft for providing plasmid used in  
670 bacterial expression of redox inactive PDI, Dr Aster Pijning for assistance in flow cytometry data  
671 analysis, and Dr Matthew Graus for advice in PDI and Mac-1 colocalization analysis. A.D. is  
672 supported by the Australian Government Research Training Program Scholarship. C.A.S. and  
673 F.G. acknowledge the support by the Klaus Tschira Foundation and the Deutsche  
674 Forschungsgemeinschaft (DFG, German Research Foundation) under Germany's Excellence  
675 Strategy –2082/1 –390761711. P.J.H. is funded by the National Health and Medical Research  
676 Council of Australia (grant numbers 1110219, 1143400 and 1143398 to PH) and a Senior  
677 Researcher Grant from the NSW Cardiovascular Research Capacity Program. F.H.P. is funded  
678 by a Ramaciotti Foundations Health Investment Grant from the Ramaciotti Foundations, a  
679 Ministry of Health New South Wales Cardiovascular Early Mid Career Research Grant and a  
680 Sydney Cardiovascular Fellowship from the University of Sydney and Heart Research Institute.



681 J.C. is funded by the Robert and Helen Ellis Postdoctoral Fellowship and the Tony Basten  
682 Postdoctoral Fellowship from the Sydney Medical School Foundation, University of Sydney.

683

### 684 **Authorship Contributions**

685 P.J.H., F.H.P and J.C. conceived the project. A.D. and F.H.P. designed, performed and  
686 analyzed data from microfluidic and imaging studies. A.D. and J.C. designed, performed and  
687 analyzed data from mass spectrometry. A.Y. built the structural model of extended Mac-1.  
688 C.A.S. and F.G. designed, performed and analyzed data from molecular dynamics simulations.  
689 All authors contributed to the writing of the manuscript.

690

### 691 **Competing interest statement**

692 The authors have no competing interest to declare.

693

### 694 **References**

- 695 Abraham, M.K., Murtola, T., Schulz, R., Pall, S., Smith, J.C., Hess, B., and Lindahl, E. (2015). GROMACS:  
696 High performance molecular simulations through multi-level parallelism from laptops to  
697 supercomputers. *SoftwareX* 1-2, 19-25.
- 698 Al-Shamkhani, A., and Law, S.K. (1998). Expression of the H52 epitope on the beta2 subunit is dependent  
699 on its interaction with the alpha subunits of the leukocyte integrins LFA-1, Mac-1 and p150,95 and the  
700 presence of Ca<sup>2+</sup>. *Eur J Immunol* 28, 3291-3300.
- 701 Amadei, A., Linssen, A.B., and Berendsen, H.J. (1993). Essential dynamics of proteins. *Proteins* 17, 412-  
702 425.
- 703 Bai, M., Grieshaber-Bouyer, R., Wang, J., Schmider, A.B., Wilson, Z.S., Zeng, L., Halyabar, O., Godin, M.D.,  
704 Nguyen, H.N., Levescot, A., *et al.* (2017). CD177 modulates human neutrophil migration through  
705 activation-mediated integrin and chemoreceptor regulation. *Blood* 130, 2092-2100.
- 706 Bajt, M.L., Goodman, T., and McGuire, S.L. (1995). Beta 2 (CD18) mutations abolish ligand recognition by  
707 I domain integrins LFA-1 (alpha L beta 2, CD11a/CD18) and MAC-1 (alpha M beta 2, CD11b/CD18). *J Biol*  
708 *Chem* 270, 94-98.
- 709 Berendsen, H.J.C., Postma, J.P.M., Van Gunsteren, W.F., DiNola, A., and Haak, J.R. (1984). Molecular  
710 dynamics with coupling to an external bath. *J Chem Phys* 81, 3684-3690.
- 711 Best, R.B., Zhu, X., Shim, J., Lopes, P.E., Mittal, J., Feig, M., and Mackerell, A.D., Jr. (2012). Optimization  
712 of the additive CHARMM all-atom protein force field targeting improved sampling of the backbone phi,  
713 psi and side-chain chi(1) and chi(2) dihedral angles. *J Chem Theory Comput* 8, 3257-3273.
- 714 Buffone, A., Jr., Anderson, N.R., and Hammer, D.A. (2018). Migration against the direction of flow is LFA-  
715 1-dependent in human hematopoietic stem and progenitor cells. *J Cell Sci* 131.
- 716 Buffone, A., Jr., Anderson, N.R., and Hammer, D.A. (2019). Human Neutrophils Will Crawl Upstream on  
717 ICAM-1 If Mac-1 Is Blocked. *Biophys J* 117, 1393-1404.

- 718 Chen, X., Xie, C., Nishida, N., Li, Z., Walz, T., and Springer, T.A. (2010). Requirement of open headpiece  
719 conformation for activation of leukocyte integrin alphaXbeta2. *Proc Natl Acad Sci U S A* *107*, 14727-  
720 14732.
- 721 Chiu, J. (2019). Measurement of the redox states of the  $\beta 3$  integrin disulfide bonds by mass  
722 spectrometry. *Bio-Protocol* *9*, e3156.
- 723 Costescu, B.I., and Grater, F. (2013). Time-resolved force distribution analysis. *BMC Biophys* *6*, 5.
- 724 Darden, T., York, D., and Pedersen, L.G. (1995). Particle mesh Ewald: An  $N \cdot \log(N)$  method for Ewald sums  
725 in large systems. *J Chem Phys* *98*, 10089–10092.
- 726 Diamond, M.S., Garcia-Aguilar, J., Bickford, J.K., Corbi, A.L., and Springer, T.A. (1993). The I domain is a  
727 major recognition site on the leukocyte integrin Mac-1 (CD11b/CD18) for four distinct adhesion ligands.  
728 *J Cell Biol* *120*, 1031-1043.
- 729 Diamond, M.S., and Springer, T.A. (1993a). A subpopulation of Mac-1 (CD11b/CD18) molecules mediates  
730 neutrophil adhesion to ICAM-1 and fibrinogen. *J Cell Biol* *120*, 545-556.
- 731 Diamond, M.S., and Springer, T.A. (1993b). A subpopulation of Mac-1 (CD11b/CD18) molecules mediates  
732 neutrophil adhesion to ICAM-1 and fibrinogen. *J Cell Biol* *120*, 545-556.
- 733 Diamond, M.S., Staunton, D.E., Marlin, S.D., and Springer, T.A. (1991). Binding of the integrin Mac-1  
734 (CD11b/CD18) to the third immunoglobulin-like domain of ICAM-1 (CD54) and its regulation by  
735 glycosylation. *Cell* *65*, 961-971.
- 736 Dupuy, A., Ju, L.A., and Passam, F.H. (2019). Straight channel microfluidic chips for the study of platelet  
737 adhesion under flow. *Bio-Protocol* *9*, e3195.
- 738 Essmann, U., Perera, L., Berkowitz, M.L., Darden, T., Lee, H., and Pedersen, L.G. (1995). A smooth  
739 particle mesh Ewald method. *J Chem Phys* *103*, 8577-8593.
- 740 Ezratty, E.J., Bertaux, C., Marcantonio, E.E., and Gundersen, G.G. (2009). Clathrin mediates integrin  
741 endocytosis for focal adhesion disassembly in migrating cells. *J Cell Biol* *187*, 733-747.
- 742 Fan, Z., Kiosses, W.B., Sun, H., Orecchioni, M., Ghosheh, Y., Zajonc, D.M., Arnaout, M.A., Gutierrez, E.,  
743 Groisman, A., Ginsberg, M.H., *et al.* (2019). High-affinity bent  $\beta 2$ -integrin molecules in arresting  
744 neutrophils face each other through binding to ICAMs in cis. *Cell Reports* *26*, 119-130.
- 745 Gomez, I.G., Tang, J., Wilson, C.L., Yan, W., Heinecke, J.W., Harlan, J.M., and Raines, E.W. (2012).  
746 Metalloproteinase-mediated Shedding of Integrin  $\beta 2$  promotes macrophage efflux from inflammatory  
747 sites. *Journal of Biological Chemistry* *287*, 4581-4589.
- 748 Hahm, E., Li, J., Kim, K., Huh, S., Rogelj, S., and Cho, J. (2013). Extracellular protein disulfide isomerase  
749 regulates ligand-binding activity of  $\alpha \text{Mb}2$  integrin and neutrophil recruitment during vascular  
750 inflammation. *Blood* *121*, 3789-3800.
- 751 Hess, B., Bekker, H., Berendsen, H.J.C., and Fraaije, J.G.E.M. (1998). LINCS: A linear constraint solver for  
752 molecular simulations. *J Comput Chem* *18*, 1463-1472.
- 753 Hyun, Y.M., Choe, Y.H., Park, S.A., and Kim, M. (2019). LFA-1 (CD11a/CD18) and Mac-1 (CD11b/CD18)  
754 distinctly regulate neutrophil extravasation through hotspots I and II. *Exp Mol Med* *51*, 1-13.
- 755 Hyun, Y.M., Lefort, C.T., and Kim, M. (2009). Leukocyte integrins and their ligand interactions. *Immunol*  
756 *Res* *45*, 195-208.

- 757 Kishimoto, T.K., Jutila, M.A., Berg, E.L., and Butcher, E.C. (1989). Neutrophil Mac-1 and MEL-14 adhesion  
758 proteins inversely regulated by chemotactic factors. *Science* *245*, 1238-1241.
- 759 Lefort, C.T., Hyun, Y.M., Schultz, J.B., Law, F.Y., Waugh, R.E., Knauf, P.A., and Kim, M. (2009). Outside-in  
760 signal transmission by conformational changes in integrin Mac-1. *J Immunol* *183*, 6460-6468.
- 761 Ley, K., Laudanna, C., Cybulsky, M.I., and Nourshargh, S. (2007). Getting to the site of inflammation: the  
762 leukocyte adhesion cascade updated. *Nat Rev Immunol* *7*, 678-689.
- 763 Li, N., Mao, D., Lu, S., Tong, C., Zhang, Y., and Long, M. (2013). Distinct binding affinities of Mac-1 and  
764 LFA-1 in neutrophil activation. *J Immunol* *190*, 4371-4381.
- 765 Li, N., Yang, H., Wang, M., Lu, S., Zhang, Y., and Long, M. (2018). Ligand-specific binding forces of LFA-1  
766 and Mac-1 in neutrophil adhesion and crawling. *Mol Biol Cell* *29*, 408-418.
- 767 Mashiach, E., Nussinov, R., and Wolfson, H.J. (2010). FiberDock: a web server for flexible induced-fit  
768 backbone refinement in molecular docking. *Nucleic Acids Res* *38*, W457-461.
- 769 Mathew, E.C., Shaw, J.M., Bonilla, F.A., Law, S.K., and Wright, D.A. (2000). A novel point mutation in  
770 CD18 causing the expression of dysfunctional CD11/CD18 leucocyte integrins in a patient with leucocyte  
771 adhesion deficiency (LAD). *Clin Exp Immunol* *121*, 133-138.
- 772 Mercadante, D., Grater, F., and Daday, C. (2018). CONAN: A Tool to Decode Dynamical Information from  
773 Molecular Interaction Maps. *Biophys J* *114*, 1267-1273.
- 774 Miyamoto, S., and Kollman, P.A. (1992). SETTLE: An analytical version of the SHAKE and RATTLE  
775 algorithm for rigid water models. *J Comput Chem* *13*, 952-962.
- 776 Nose, S. (1884). A unified formulation of the constant temperature molecular dynamics methods. *J*  
777 *Chem Phys* *81*, 511-519.
- 778 Oxvig, C., Lu, C., and Springer, T.A. (1999). Conformational changes in tertiary structure near the ligand  
779 binding site of an integrin I domain. *Proc Natl Acad Sci U S A* *96*, 2215-2220.
- 780 Pall, S., and Hess, B. (2013). A flexible algorithm for calculating pair interactions on SIMD architectures.  
781 *Comput Phys Commun* *184*, 2641-2650.
- 782 Parrinella, M., and Rahman, A. (1981). Polymorphic transitions in single crystals: A new molecular  
783 dynamics method. *J App Phys* *52*, 7182-7190.
- 784 Passam, F., Chiu, J., Ju, L., Pijning, A., Jahan, Z., Mor-Cohen, R., Yeheskel, A., Kolšek, K., Thärichen, L.,  
785 Aponte-Santamaría, C., *et al.* (2018). Mechanoredox control of integrin de-adhesion. *eLife* *7*, e34843.
- 786 Perez-Riverol, Y., Bai, J., Bandla, C., Garcia-Seisdedos, D., Hewapathirana, S., Kamatchinathan, S., Kundu,  
787 D.J., Prakash, A., Frericks-Zipper, A., Eisenacher, M., *et al.* (2022). The PRIDE database resources in 2022:  
788 a hub for mass spectrometry-based proteomics evidences. *Nucleic Acids Res* *50*, D543-D552.
- 789 Sakariassen, K.S., Orning, L., and Turitto, V.T. (2015). The impact of blood shear rate on arterial  
790 thrombus formation. *Future Sci OA* *1*, FSO30.
- 791 Sen, M., and Springer, T.A. (2016). Leukocyte integrin alphaLbeta2 headpiece structures: The alphaL  
792 domain, the pocket for the internal ligand, and concerted movements of its loops. *Proc Natl Acad Sci U S*  
793 *A* *113*, 2940-2945.
- 794 Sen, M., Yuki, K., and Springer, T.A. (2013). An internal ligand-bound, metastable state of a leukocyte  
795 integrin, alphaXbeta2. *J Cell Biol* *203*, 629-642.

796 Shimaoka, M., Xiao, T., Liu, J.H., Yang, Y., Dong, Y., Jun, C.D., McCormack, A., Zhang, R., Joachimiak, A.,  
797 Takagi, J., *et al.* (2003). Structures of the alpha L I domain and its complex with ICAM-1 reveal a shape-  
798 shifting pathway for integrin regulation. *Cell* *112*, 99-111.

799 Sievers, F., Wilm, A., Dineen, D., Gibson, T.J., Karplus, K., Li, W., Lopez, R., McWilliam, H., Remmert, M.,  
800 Söding, J., *et al.* (2011). Fast, scalable generation of high-quality protein multiple sequence alignments  
801 using Clustal Omega. *Mol Syst Biol* *7*, e539.

802 Singh, R.K., Liao, W., Tracey-White, D., Recchi, C., Tolmachova, T., Rankin, S.M., Hume, A.N., and Seabra,  
803 M.C. (2012). Rab27a-mediated protease release regulates neutrophil recruitment by allowing uropod  
804 detachment. *J Cell Sci* *125*, 1652-1656.

805 Smith, A., Carrasco, Y.R., Stanley, P., Kieffer, N., Batista, F.D., and Hogg, N. (2005). A talin-dependent  
806 LFA-1 focal zone is formed by rapidly migrating T lymphocytes. *J Cell Biol* *170*, 141-151.

807 Sumagin, R., Prizant, H., Lomakina, E., Waugh, R.E., and Sarelius, I.H. (2010). LFA-1 and Mac-1 define  
808 characteristically different intraluminal crawling and emigration patterns for monocytes and  
809 neutrophils in situ. *J Immunol* *185*, 7057-7066.

810 Takami, M., Herrera, R., and Petruzzelli, L. (2001). Mac-1-dependent tyrosine phosphorylation during  
811 neutrophil adhesion. *Am J Physiol Cell Physiol* *280*, C1045-1056.

812 Uzel, G., Tng, E., Rosenzweig, S.D., Hsu, A.P., Shaw, J.M., Horwitz, M.E., Linton, G.F., Anderson, S.M.,  
813 Kirby, M.R., Oliveira, J.B., *et al.* (2008). Reversion mutations in patients with leukocyte adhesion  
814 deficiency type-1 (LAD-1). *Blood* *111*, 209-218.

815 Valignat, M.P., Negre, P., Cadra, S., Lellouch, A.C., Gallet, F., Henon, S., and Theodoly, O. (2014).  
816 Lymphocytes can self-steer passively with wind vane uropods. *Nat Commun* *5*, 5213.

817 van de Vijver, E., Maddalena, A., Sanal, Ö., Holland, S.M., Uzel, G., Madkaikar, M., de Boer, M., Leeuwen,  
818 K., Köker, M.Y., Parvaneh, N., *et al.* (2012). Hematologically important mutations: Leukocyte Adhesion  
819 Deficiency (first update). *Blood Cells Mol Dis* *48*, 53-61.

820 Van Der Spoel, D., Lindahl, E., Hess, B., Groenhof, G., Mark, A.E., and Berendsen, H.J. (2005). GROMACS:  
821 fast, flexible, and free. *J Comput Chem* *26*, 1701-1718.

822 Volmering, S., Block, H., Boras, M., Lowell, C.A., and Zarbock, A. (2016). The Neutrophil Btk Signalosome  
823 Regulates Integrin Activation during Sterile Inflammation. *Immunity* *44*, 73-87.

824 Waterhouse, A., Bertoni, M., Bienert, S., Studer, G., Tauriello, G., Gumienny, R., Heer, F.T., de Beer,  
825 T.A.P., Rempfer, C., Bordoli, L., *et al.* (2018). SWISS-MODEL: homology modelling of protein structures  
826 and complexes. *Nucleic Acids Res* *46*, W296-W303.

827 Wolf, D., Anto-Michel, N., Blankenbach, H., Wiedemann, A., Buscher, K., Hohmann, J.D., Lim, B., Bauml,  
828 M., Marki, A., Mauler, M., *et al.* (2018). A ligand-specific blockade of the integrin Mac-1 selectively  
829 targets pathologic inflammation while maintaining protective host-defense. *Nat Commun* *9*, 525.

830 Xiong, J.P., Mahalingham, B., Alonso, J.L., Borrelli, L.A., Rui, X., Anand, S., Hyman, B.T., Rysiok, T., Muller-  
831 Pompalla, D., Goodman, S.L., *et al.* (2009). Crystal structure of the complete integrin alphaVbeta3  
832 ectodomain plus an alpha/beta transmembrane fragment. *J Cell Biol* *186*, 589-600.

833 Yang, W., Shimaoka, M., Chen, J., and Springer, T.A. (2004). Activation of integrin beta-subunit I-like  
834 domains by one-turn C-terminal alpha-helix deletions. *Proc Natl Acad Sci U S A* *101*, 2333-2338.

835



837 **Tables**

838 **Table 1. The decay constant ( $K$ ) and shear force ( $F_{50}$ ) at which 50% of BHK cells**  
839 **expressing wild type or disulfide mutant Mac-1 were de-adhered from immobilized ICAM-**  
840 **1.**

|                          | <b><math>K</math> (cm<sup>2</sup>dynes<sup>-1</sup>)</b> | <b><math>F_{50}</math> (dynes/cm<sup>2</sup>)</b> |
|--------------------------|----------------------------------------------------------|---------------------------------------------------|
| Vector alone             | 8.979                                                    | 0.07720                                           |
| WT Mac-1 + PBS           | 0.4399                                                   | 1.576                                             |
| WT Mac-1 + reduced PDI   | 0.9496                                                   | 0.7299                                            |
| WT Mac-1 + oxidized PDI  | 0.4743                                                   | 1.461                                             |
|                          |                                                          |                                                   |
| WT Mac-1                 | 0.5321                                                   | 1.303                                             |
| C169,C176S               | 0.6689                                                   | 1.036                                             |
| C224,264S                | 2.043                                                    | 0.3392                                            |
| C224,264S and C169,C176S | 1.236                                                    | 0.5606                                            |

841

842

## 843 **Figure Legends**

844 **Figure 1. PDI colocalizes with active Mac-1 on trailing edge of neutrophils adhered to**  
845 **ICAM-1 under fluid shear. (A)** Representative images of neutrophils adhered to ICAM-1  
846 coated surface under fluid shear. Surface PDI was detected using anti-PDI antibody DL-11 and  
847 Alexa-Fluor 488-conjugated goat anti-rabbit IgG (green), and high affinity active Mac-1 was  
848 detected using an APC conjugated anti-CD11b antibody CBRM1/5 (red). After staining with  
849 antibodies, neutrophils were stimulated with 1  $\mu\text{M}$  fMLF, perfused onto ICAM-1 coated  
850 microfluidic channels at 0.175 dynes/cm<sup>2</sup> and left to adhere. Adhered neutrophils were  
851 subjected to fluid shear at 0.7 dynes/cm<sup>2</sup> or 5.6 dynes/cm<sup>2</sup> for 1 min before being imaged by  
852 confocal microscopy. Scale bar represents 10  $\mu\text{m}$ . **(B)** Analysis of colocalization of surface PDI  
853 and Mac-1 at the leading or trailing edge of neutrophils. Leading and trailing edges of each  
854 neutrophil were defined by protrusion and trailing tail observed in DIC images. Manders'  
855 colocalization coefficients for PDI and Mac-1 was determined from 29 cells at 0.7 dynes/cm<sup>2</sup>  
856 and 25 cells at 5.6 dynes/cm<sup>2</sup> from 3 independent experiments. Data shown is mean  $\pm$  SD from  
857 independent experiments. \*\*\*\*P<0.0001 assessed by two-tailed, paired Wilcoxon test of the  
858 leading and trailing edges of the same cell.

859 **Figure 1 – figure supplement 1. Surface PDI colocalizes with active Mac-1 on neutrophils**  
860 **adhered to ICAM-1 in static condition.** Neutrophils were isolated from human blood and  
861 stimulated with fMLF. Surface PDI was detected using Alexa fluor 488 conjugated anti-PDI  
862 antibody DL-11 (green) on resting or fMLF-stimulated human neutrophils. Active Mac-1 was  
863 detected using an APC conjugated anti-CD11b antibody CBRM1/5 (red). After staining with  
864 antibodies, neutrophils were added to ICAM-1 coated surface and allowed to adhere before  
865 fixing with 4% paraformaldehyde and imaged by confocal microscopy. Scale bar represents 10  
866  $\mu\text{m}$ .

867 **Figure 2. PDI selectively cleaves two  $\beta$ 1-domain disulfide bonds in  $\beta$ 2 integrin. (A)**  
868 Differential cysteine alkylation and mass spectrometry method was employed to measure the  
869 redox state of disulfide bonds in recombinant  $\beta$ 2 integrin. Unpaired cysteine thiols were labelled  
870 with <sup>12</sup>C-IPA and the disulfide bonded cysteine thiols with <sup>13</sup>C-IPA following reduction with DTT.  
871 49 peptides encompassing 24 of the 28  $\beta$ 2 disulfide bonds were mapped. **(B).** The redox state  
872 of 24 of the 28  $\beta$ 2 disulfide bonds was measured in the absence or presence of 10-fold molar  
873 excess of PDI or redox inactive PDI mutant (riPDI). Data shown is mean  $\pm$  SEM of 2-4 peptides.  
874 \*\*\*P<0.001 assessed by unpaired, two-tailed Student's t-test. **(C)** Model of Mac-1 in extended  
875 conformation. The  $\beta$ 2 disulfide bonds quantified in panel B are shown as yellow spheres and  
876 disulfide bonds that were not mapped are shown as gray spheres. Both C169-C176 and C224-  
877 C264 disulfide bonds reside in the  $\beta$ 1 domain.

878 **Figure 2 – figure supplement 1. Differential cysteine alkylation and mass spectrometry**  
879 **analysis of cysteine redox state in the  $\beta$ 2 integrin.** A) Resolution of  $\beta$ 1-domain Cys264  
880 containing peptide CHLEDNY with <sup>12</sup>C-IPA (upper trace) or <sup>13</sup>C-IPA (lower trace) alkylation  
881 under HPLC. B) Representative tandem mass spectra of the CHLEDNY peptide, showing <sup>12</sup>C-  
882 IPA (upper trace) or <sup>13</sup>C-IPA (lower trace) alkylation of Cys264. The accurate mass spectrum of  
883 the peptide is shown in the insets (upper trace, observed  $[M+2H]^{2+} = 570.2451$  m/z and  
884 expected  $[M+2H]^{2+} = 570.2449$  m/z; lower trace, observed  $[M+2H]^{2+} = 573.2553$  m/z and  
885 expected  $[M+2H]^{2+} = 573.2550$ ).

886 **Figure 3. PDI cleavage of Mac-1 C224-C264 disulfide bond promote cell de-adhesion from**  
887 **ICAM-1 under shear force (A)** Detection of Mac-1 expression (WT or disulfide mutants) in BHK  
888 cells. cDNA constructs for *ITGAM* and *ITGB2* were co-transfected into BHK cells. Expression of  
889 wild-type (WT) Mac-1 or disulfide mutant were detected using Alexa Fluor 488 conjugated H52  
890 antibody specific to  $\beta 2$  integrin by flow cytometry. Transfection with empty vector served as  
891 negative control. **(B)** De-adhesion assays of BHK cells expressing WT Mac-1 incubated without  
892 or with PDI to immobilized ICAM-1 under increasing shear force. Calcein-stained BHK cells  
893 incubated without or with 1 $\mu$ M reduced or oxidized PDI were perfused and allowed to adhere to  
894 ICAM-1 coated microfluidic channels for 15 min. Cells were subjected to shear force at each  
895 defined shear rate for 1 min (0.175, 0.35, 0.7, 1.4, 2.8, 5.6 and 11.2 dynes/cm<sup>2</sup>) to allow cell de-  
896 adhesion. Images were acquired and the number of adhered cells remained at each shear rate  
897 was quantified. **(C)** Area under each curve of de-adhesion from panel B. Data represent mean  $\pm$   
898 SEM of three biological replicates. \*P<0.05; \*\*P<0.01 by one-way ANOVA with Dunnett's post-  
899 hoc multiple comparisons. **(D)** De-adhesion assays of BHK cells expressing WT Mac-1 or  
900 disulfide mutant to immobilized ICAM-1 under increasing shear force (0.175, 0.35, 0.7, 1.4, 2.8,  
901 5.6 and 11.2 dynes/cm<sup>2</sup>). Images were acquired and the number of adhered cells remained at  
902 each shear rate was quantified. **(E)** Area under each curve of de-adhesion from panel D. Data  
903 represent mean  $\pm$  SEM of three biological replicates. \*P<0.05; N.S.=non-significant by one-way  
904 ANOVA with Dunnett's post-hoc multiple comparisons.

905 **Figure 3 – figure supplement 1. Adhesion of Mac-1 expressing BHK cells to ICAM-1 under**  
906 **static conditions.** BHK cells expressing wild type Mac-1 or disulfide mutants were left to  
907 adhere on an ICAM-1/Fc coated 96 well plate at 37°C for 2 h. Cells were washed, stained with  
908 calcein AM, and fluorescence at 488/520 nm measured. Fluorescence intensity is shown as the  
909 mean  $\pm$  SEM of 4-5 independent experiments.

910 **Figure 3 – figure supplement 2. De-adhesion assays of Mac-1 expressing BHK cells from**  
911 **immobilized fibrinogen under increasing shear force. (A)** Calcein-stained BHK cells were  
912 perfused and allowed to adhere to fibrinogen coated microfluidic channel for 15 min. Cells were  
913 subjected to shear force at each defined shear rate for 1 min (0.175, 0.35, 0.7, 1.4, 2.8, 5.6 and  
914 11.2 dynes/cm<sup>2</sup>) to allow cell de-adhesion. Images were acquired and the number of adhered  
915 cells remained at each shear rate was quantified. **(B)** Area under each curve was from panel B.  
916 Data represent mean  $\pm$  SEM of three biological replicates. P<0.05; N.S.=non-significant by one-  
917 way ANOVA with Dunnett's post-hoc multiple comparisons.

918 **Figure 4. Cleavage of the C224-C264 disulfide bond favors Mac-1 extended closed**  
919 **conformation. (A)** Schematic representation of the Mac-1 conformation states and the location  
920 of epitopes recognized by antibodies H52 (conformation independent), MEM48 (extended state)  
921 and CBRM1/5 (extended open state). The two  $\beta$ I-domain disulfide bonds (S-S) are shown. **(B)**  
922 Determining the conformations of Mac-1 (WT or disulfide mutants) expressed in BHK cells. The  
923 total number of cells expressing Mac-1 was determined using H52 antibody. The proportion of  
924 cells expressing extended (both closed and open) Mac-1 was measured using MEM48  
925 antibody, while cells expressing extended open state of Mac-1 was determined using CBRM1/5.  
926 Proportion of cells expressing extended closed conformation was calculated by subtracting the  
927 number of CBRM1/5 positive cells from the MEM48 positive cells. Proportion of cells expressing  
928 bent conformation was calculated by subtracting the MEM48 positive cells from the H52 positive  
929 cells. Data shown is mean  $\pm$  SEM of three independent experiments. \*P<0.05 assessed by one-  
930 way ANOVA, with Dunnett's post-hoc multiple comparisons



931 **Figure 4 – figure supplement 1. Characterization of pan-conformation anti-CD18 antibody**  
932 **H52.** Isolated neutrophils ( $1 \times 10^6$  cells in 100  $\mu$ L of HBSS) were incubated with Alexa Fluor 488  
933 conjugated anti-CD18 antibody H52 at 1  $\mu$ g/mL in the presence or absence of 1 mM  $MnCl_2$  or  
934 10  $\mu$ M fMLF for 30 min at 37°C. Samples were then read immediately by flow cytometry on a  
935 BD Accuri C6 flow cytometer. The binding of H52 antibody to  $\beta 2$  integrins on the surface of  
936 isolated neutrophils is shown at resting (red), upon integrin extension induced by incubation with  
937  $Mn^{2+}$  (blue), and upon upregulation of  $\beta 2$  integrins induced by fMLF-stimulation (green)  
938 compared to unstained neutrophils (black).

939 **Figure 5. Cleavage of the C224-C264 disulfide bond perturbs inter-residue contact and**  
940 **mechanical in the  $\beta I$  domain of  $\beta 2$  integrin (A)** Structure of the complex is shown ( $\beta$ -propeller  
941 in wheat and  $\beta I$  domain in cyan). Position of the C169-C176 and C224-C264 disulfide bonds is  
942 indicated. Atomic positions for simulations were taken from the X-ray structure of the Leukocyte  
943 integrin  $\alpha L\beta 2$  (PDB identifier 5E6U<sup>1</sup>). LFA-1 ( $\alpha L\beta 2$ ) and Mac-1 ( $\alpha M\beta 2$ ) have identical  $\beta I$  domains  
944 and highly similar  $\beta$ -propeller domains (73% sequence similarity, 41% residues being identical).  
945 **(B)** Protein conformational changes of  $\beta I$  were monitored by principal component analysis  
946 (PCA). The main PCA eigenvector (Fig. 1) was related to conformational transitions of the loop  
947 which connects strands B2 and B3 (inset). MD trajectories were projected onto this eigenvector  
948 and the resulting histograms of the projections are shown for each simulated condition. **(C)**  
949 Change in the pair-wise contact probability  $\Delta C_{ij}$  is mapped on the 3D structure of the complex,  
950 by lines connecting the C-alpha atoms of residues  $i$  and  $j$ . The thickness of the line is  
951 proportional to the absolute value of  $\Delta C_{ij}$ , ranging from 0 to 0.4. Changes larger than 0.4 have  
952 the same (maximum) line thickness. Changes are presented for the system, X, with the C169-  
953 C176 bond (left), the C224-C264 bond (middle) bond, or both bonds (right) reduced, with  
954 respect to the wild-type situation (wt) in which both disulfide bonds are formed:  $\Delta C_{ij} = C_{ij}(X) -$   
955  $C_{ij}(wt)$ . **(D)** Change in pair-wise force  $\Delta F_{ij}$  with the same format as in C.  $\Delta F_{ij}$ , varies from 0 to 100  
956 pN, and changes larger than the latter have the same (maximum) line thickness. In C and D,  
957 pairs with normalized difference  $z > 0.5$  are shown. See definition of  $z$  in the methods and the  
958 effect of the  $z$  value in **Supplementary Fig. 6.** **(E)** Change in root mean square fluctuation  
959 (RMSF) versus amino acid sequence of  $\beta I$  is displayed:  $\Delta RMSF = RMSF(X) - RMSF(wt)$ , with X  
960 corresponding to the four simulated systems (same color coding as in B). Positions along the  
961 sequence of the involved cysteines are highlighted with the vertical lines. **(F)** Histograms of the  
962 solvent accessible surface area of  $\beta I$  (left panel) and some regions of it (middle and right  
963 panels) for the four studied systems are shown (same color as in B). Region R1 corresponds to  
964 the amino acids 188–200 (yellow) and region R2 to amino acids 214–234 and 256–293 (blue).  
965 Both regions are highlighted in the cartoon representation of  $\beta I$  at the right side.

966 **Figure 5 – figure supplement 1. MD simulations.** Changes in the pair-wise contact probability  
967  $\Delta C_{ij}$  and pair-wise force  $\Delta F_{ij}$  is mapped on the 3D structure (left) and the 2D sequence (right) of  
968 the  $\beta$ -propeller– $\beta I$  domain complex. The amino acid sequence at the right is depicted by a circle  
969 where the amino acid is position is given by an angle from 0° (N-terminus of the  $\beta$ -propeller) to  
970 360° (C-terminus of the  $\beta I$  domain). The changes are represented by lines connecting the c-  
971 alpha atoms (left) or the points along the circle (right) of residues  $i$  and  $j$ . The absolute value of  
972  $\Delta C_{ij}$  or  $\Delta F_{ij}$  is represented by the thickness of the line (left) or the color according to the shown  
973 color bars (right). Same range of values is shown both (as in the color scale) is used both at the  
974 left and at the right. Changes are presented for the system, X, with the C169-C176 bond (left  
975 column), the C224-C264 bond (middle column) bond, or both bonds (right column) reduced,  
976 with respect to the wild-type situation (wt) in which both disulfide bonds are formed:  $\Delta C_{ij} = C_{ij}(X) -$

977  $C_{ij}(wt)$  or  $\Delta F_{ij} = \langle F_{ij}(X) \rangle - \langle F_{ij}(wt) \rangle$ . The changes are presented for different normalized differences,  
978  $z$ , See definition of  $z$  in the methods.

979 **Figure 6. Reduced PDI but not control oxidized PDI promotes neutrophil motility in the**  
980 **direction of flow at high shear stress. (A)** Cell tracks of neutrophils migrating in 0.7  
981 dynes/cm<sup>2</sup> or 5.6 dynes/cm<sup>2</sup> fluid shear were measured to determine distance and direction of  
982 travel during the experiment. Each plot represents a track from an individual neutrophil. Arrow  
983 indicates the direction of shear force. Directional migration of neutrophils under fluid shear is  
984 expressed as migration index in **(B)** X- or **(C)** Y-direction. Neutrophils were treated with control  
985 oxidized or reduced PDI, stimulated with fMLF and perfused over ICAM-1-coated microfluidic  
986 chips. Adhered neutrophils were subjected to 0.7 or 5.6 dynes/cm<sup>2</sup> fluid shear and their X- and  
987 Y-displacement and total distance traveled was measured for calculation of migration index for  
988 each cell. A negative migration index in the X-direction indicates cell migration against the flow  
989 whereas a positive migration index in the X-direction indicates cell migration with the flow. **(D)**  
990 Crawling speed of neutrophils at 0.7 or 5.6 dynes/cm<sup>2</sup> shear force was calculated by  
991 determining the total distance traveled over the total time of migration. Data was mean  $\pm$  SD of  
992 three independent experiments. A total of 40 and 25 cells treated with control oxidized PDI and  
993 50 and 23 cells treated with reduced PDI was analyzed for shear force at 0.7 dynes/cm<sup>2</sup> and 5.6  
994 dynes/cm<sup>2</sup> fluid shear, respectively. \* $P < 0.05$ ; \*\* $P < 0.01$ ; \*\*\* $P < 0.001$ ; N.S.=non-significant  
995 assessed by unpaired, Mann-Whitney test.

996 **Figure 6 – figure supplement 1. Analysis of neutrophil motility adhered to ICAM-1 under**  
997 **fluid shear.** Representative images of the centroid of a single neutrophil used for determining  
998 cell track (black line). Initial position (red) and the final position (green) of the cell were  
999 measured to determine cell displacement in X- and Y-direction. Time (min) is shown on top  
1000 right. Scale bar represents 10  $\mu$ m.

1001 **Figure 6 – figure supplement 2. Percentage of neutrophils migration with flow (migration**  
1002 **index >0.15).** Data shown is mean  $\pm$  SEM of 3 independent experiments. \* $P < 0.05$ ; N.S.  
1003 indicates non-significant as assessed by two-tailed, paired student's ttest.

1004 **Figure 7. Schematic representation of mechano-redox control of Mac-1 de-adhesion from**  
1005 **ICAM-1 by PDI cleavage of an allosteric disulfide bond at the trailing edge of neutrophils.**  
1006 In its extended and open conformation, Mac-1 mediates high affinity adhesion of neutrophils to  
1007 endothelial cells via binding to ICAM-1 under shear stress. PDI colocalizes with high affinity  
1008 Mac-1 at the trailing edge of neutrophils and regulates neutrophil adhesion to endothelial cells  
1009 by cleaving the  $\beta$ I-domain disulfide bond. PDI cleavage of this disulfide induces internal  
1010 mechanical stress in the  $\beta$ I domain leading to Mac-1 switch from an extended open to an  
1011 extended closed conformation with lower affinity for ICAM-1. This results in de-adhesion at the  
1012 trailing edge of neutrophils to promote migration on endothelium in the direction of flow. **(B)**  
1013 Alignment of the  $\beta$ I domain from human  $\beta$  integrins. Protein sequences of integrins  $\beta$ 1-8 were  
1014 obtained from Uniprot and aligned using Clustal Omega (Sievers et al., 2011). Conserved  
1015 cysteines are highlighted in yellow and cysteine pairings for disulfide bonds are indicated by  
1016 brackets.

1017

1018 **Legends for Supplementary Videos1-4**

1019 **Supplementary Video 1.** Crawling of a neutrophil treated with control oxidized PDI on ICAM-1  
1020 coated microfluidic chip in presence of 0.7 dynes/cm<sup>2</sup> fluid shear. Flow direction is from right to  
1021 left. Scale bar represents 10 μm.

1022

1023 **Supplementary Video 2.** Crawling of a neutrophil treated with reduced PDI on ICAM-1 coated  
1024 microfluidic chip in presence of 0.7 dynes/cm<sup>2</sup> fluid shear. Flow direction is from right to left.  
1025 Scale bar represents 10 μm.

1026

1027 **Supplementary Video 3.** Crawling of a neutrophil treated with control oxidized PDI on ICAM-1  
1028 coated microfluidic chip in presence of 5.6 dynes/cm<sup>2</sup> fluid shear. Flow direction is from right to  
1029 left. Scale bar represents 10 μm.

1030

1031 **Supplementary Video 4.** Crawling of a neutrophil treated with reduced PDI on ICAM-1 coated  
1032 microfluidic chip in presence of 5.6 dynes/cm<sup>2</sup> fluid shear. Flow direction is from right to left.  
1033 Scale bar represents 10 μm.

1034

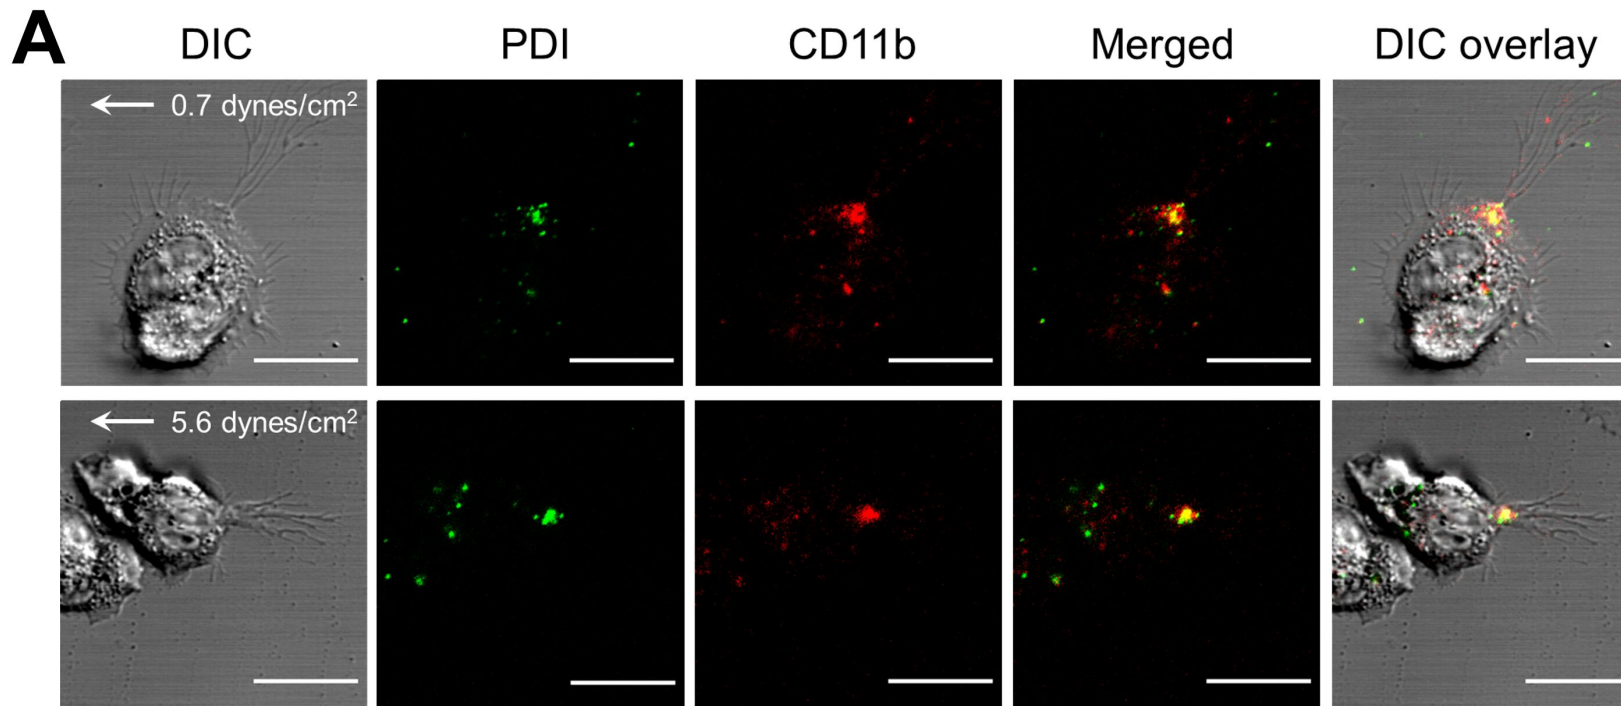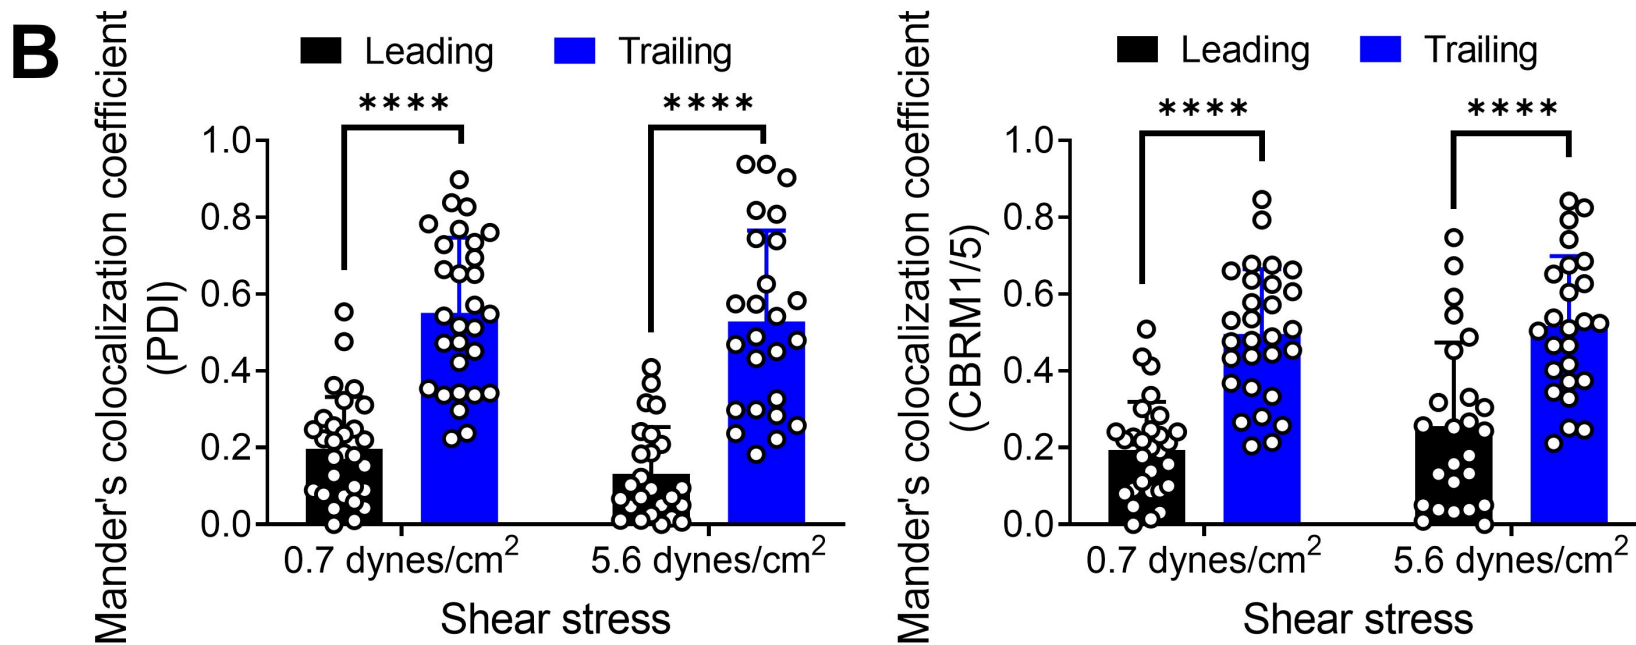

Figure 1

$\alpha_M$  integrin

PDI

Merged

Resting

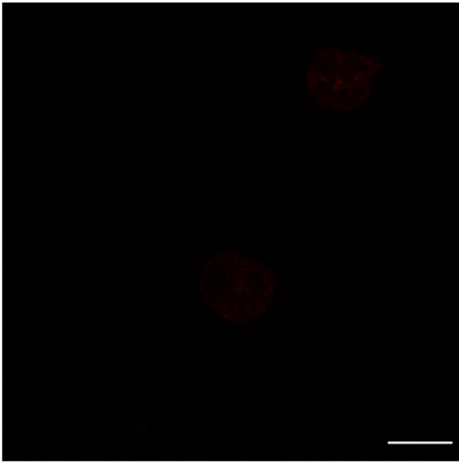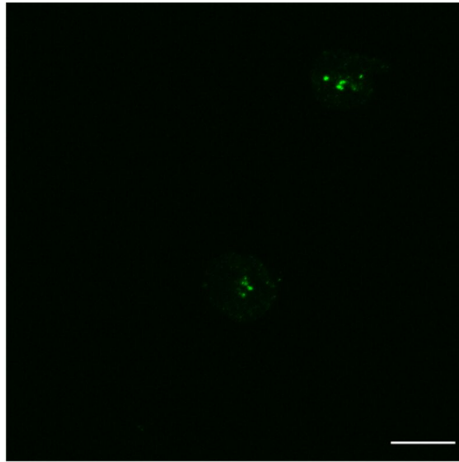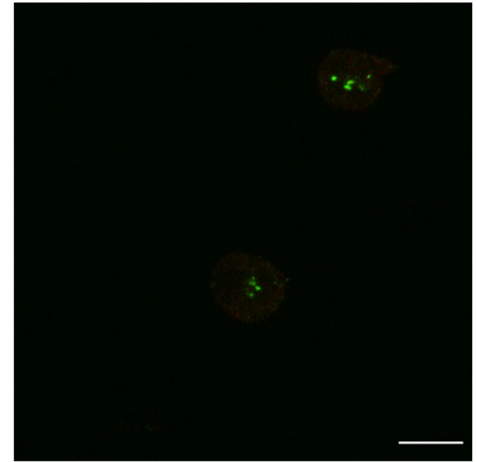

+fMLF

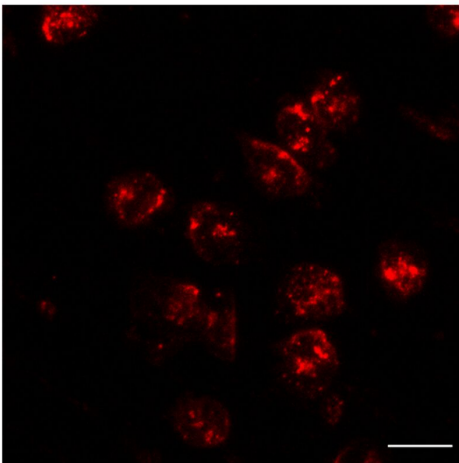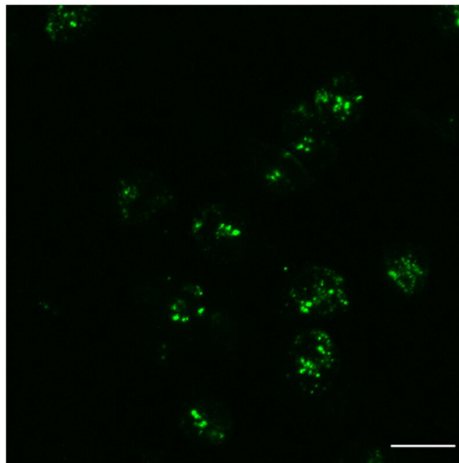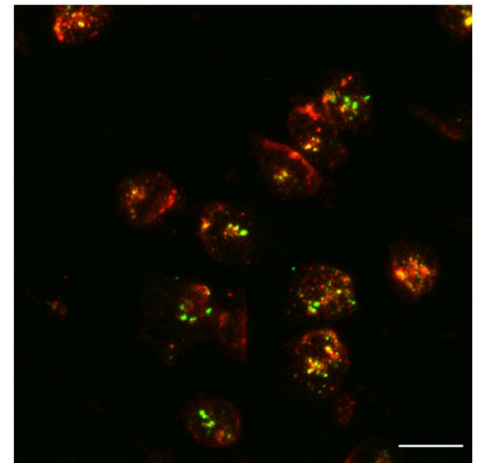

Figure 1-figure supplement 1

**A**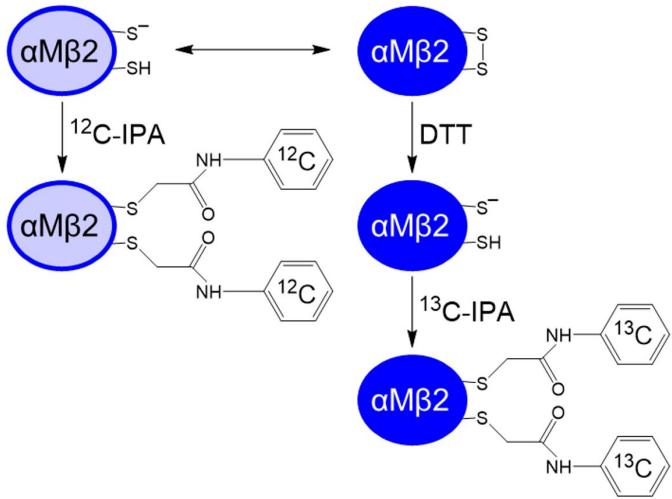**B**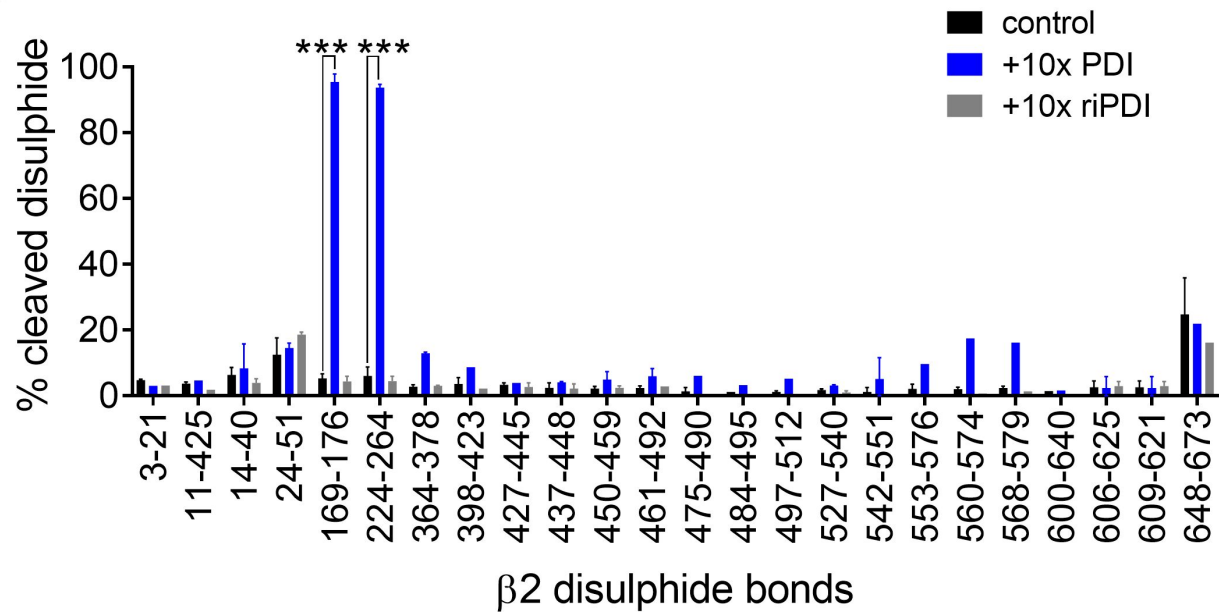**C**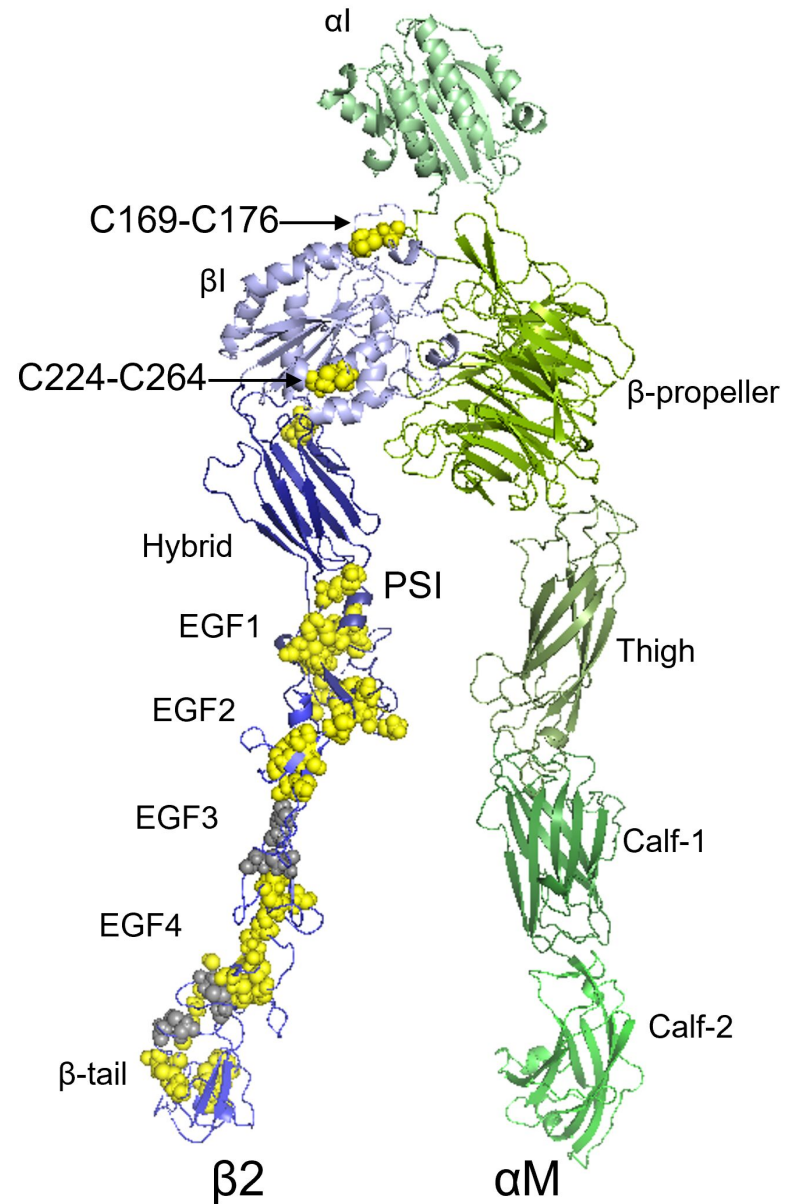

Figure 2

**A**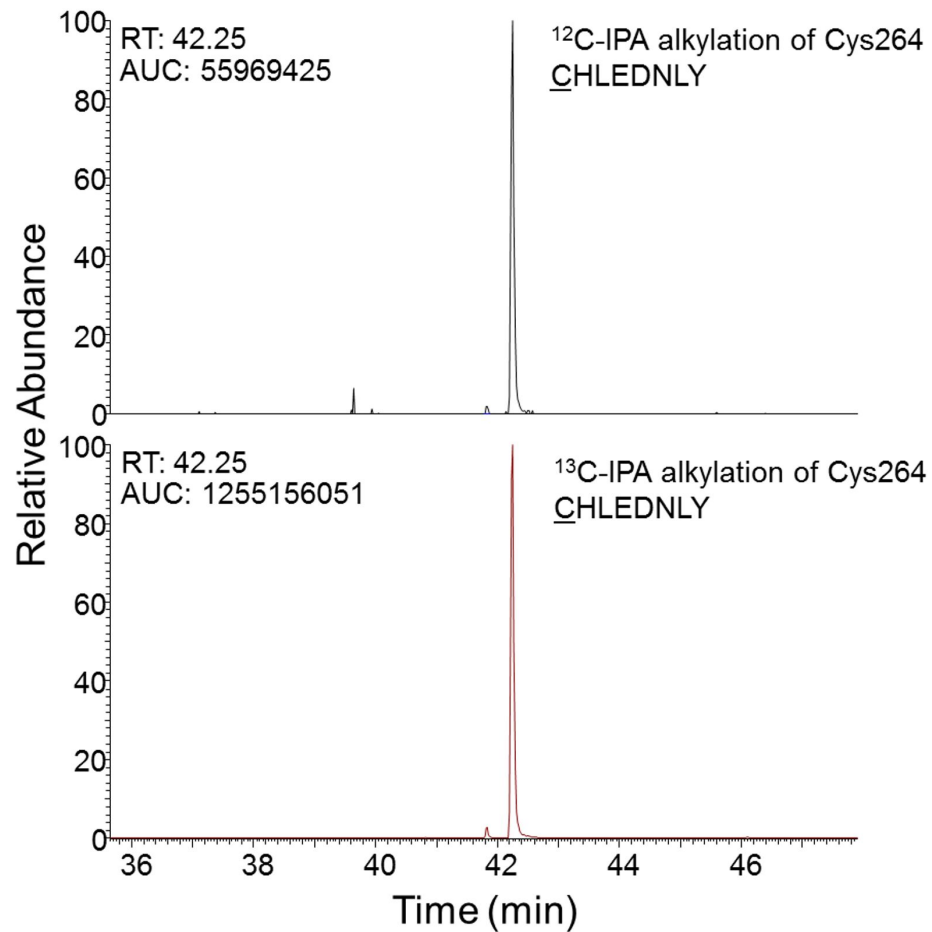**B**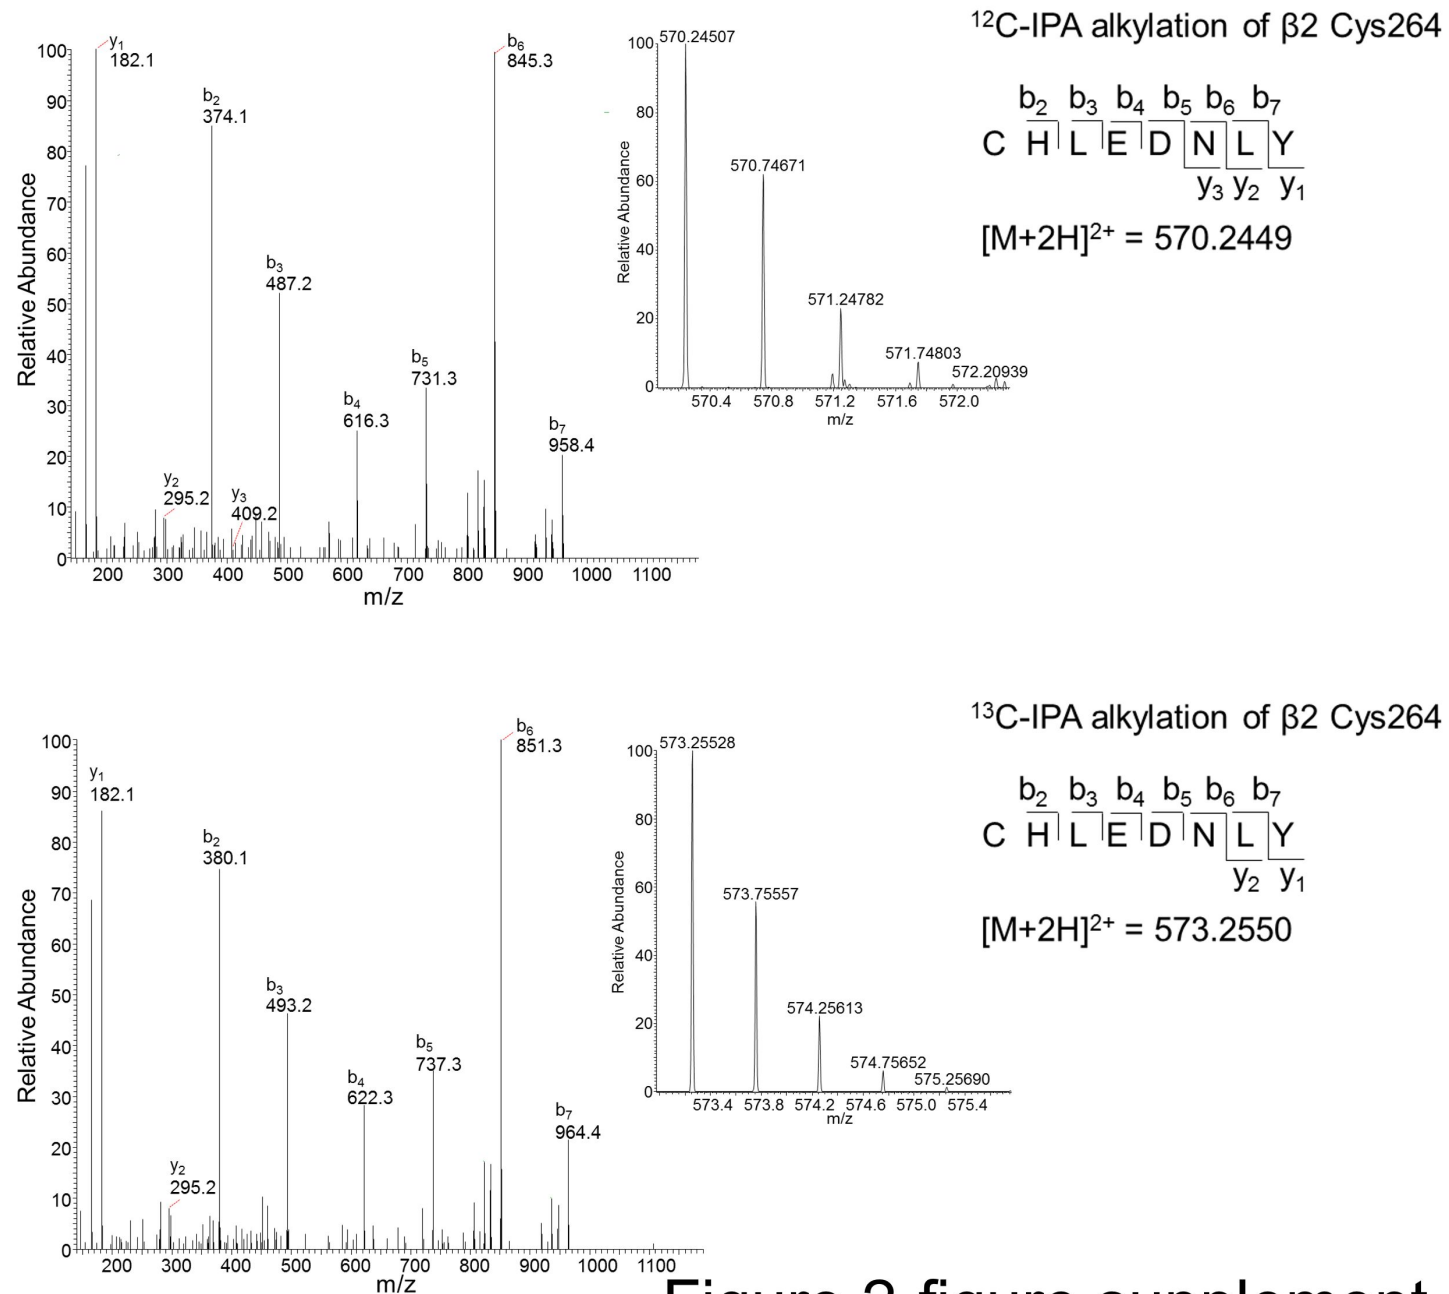

Figure 2-figure supplement 1

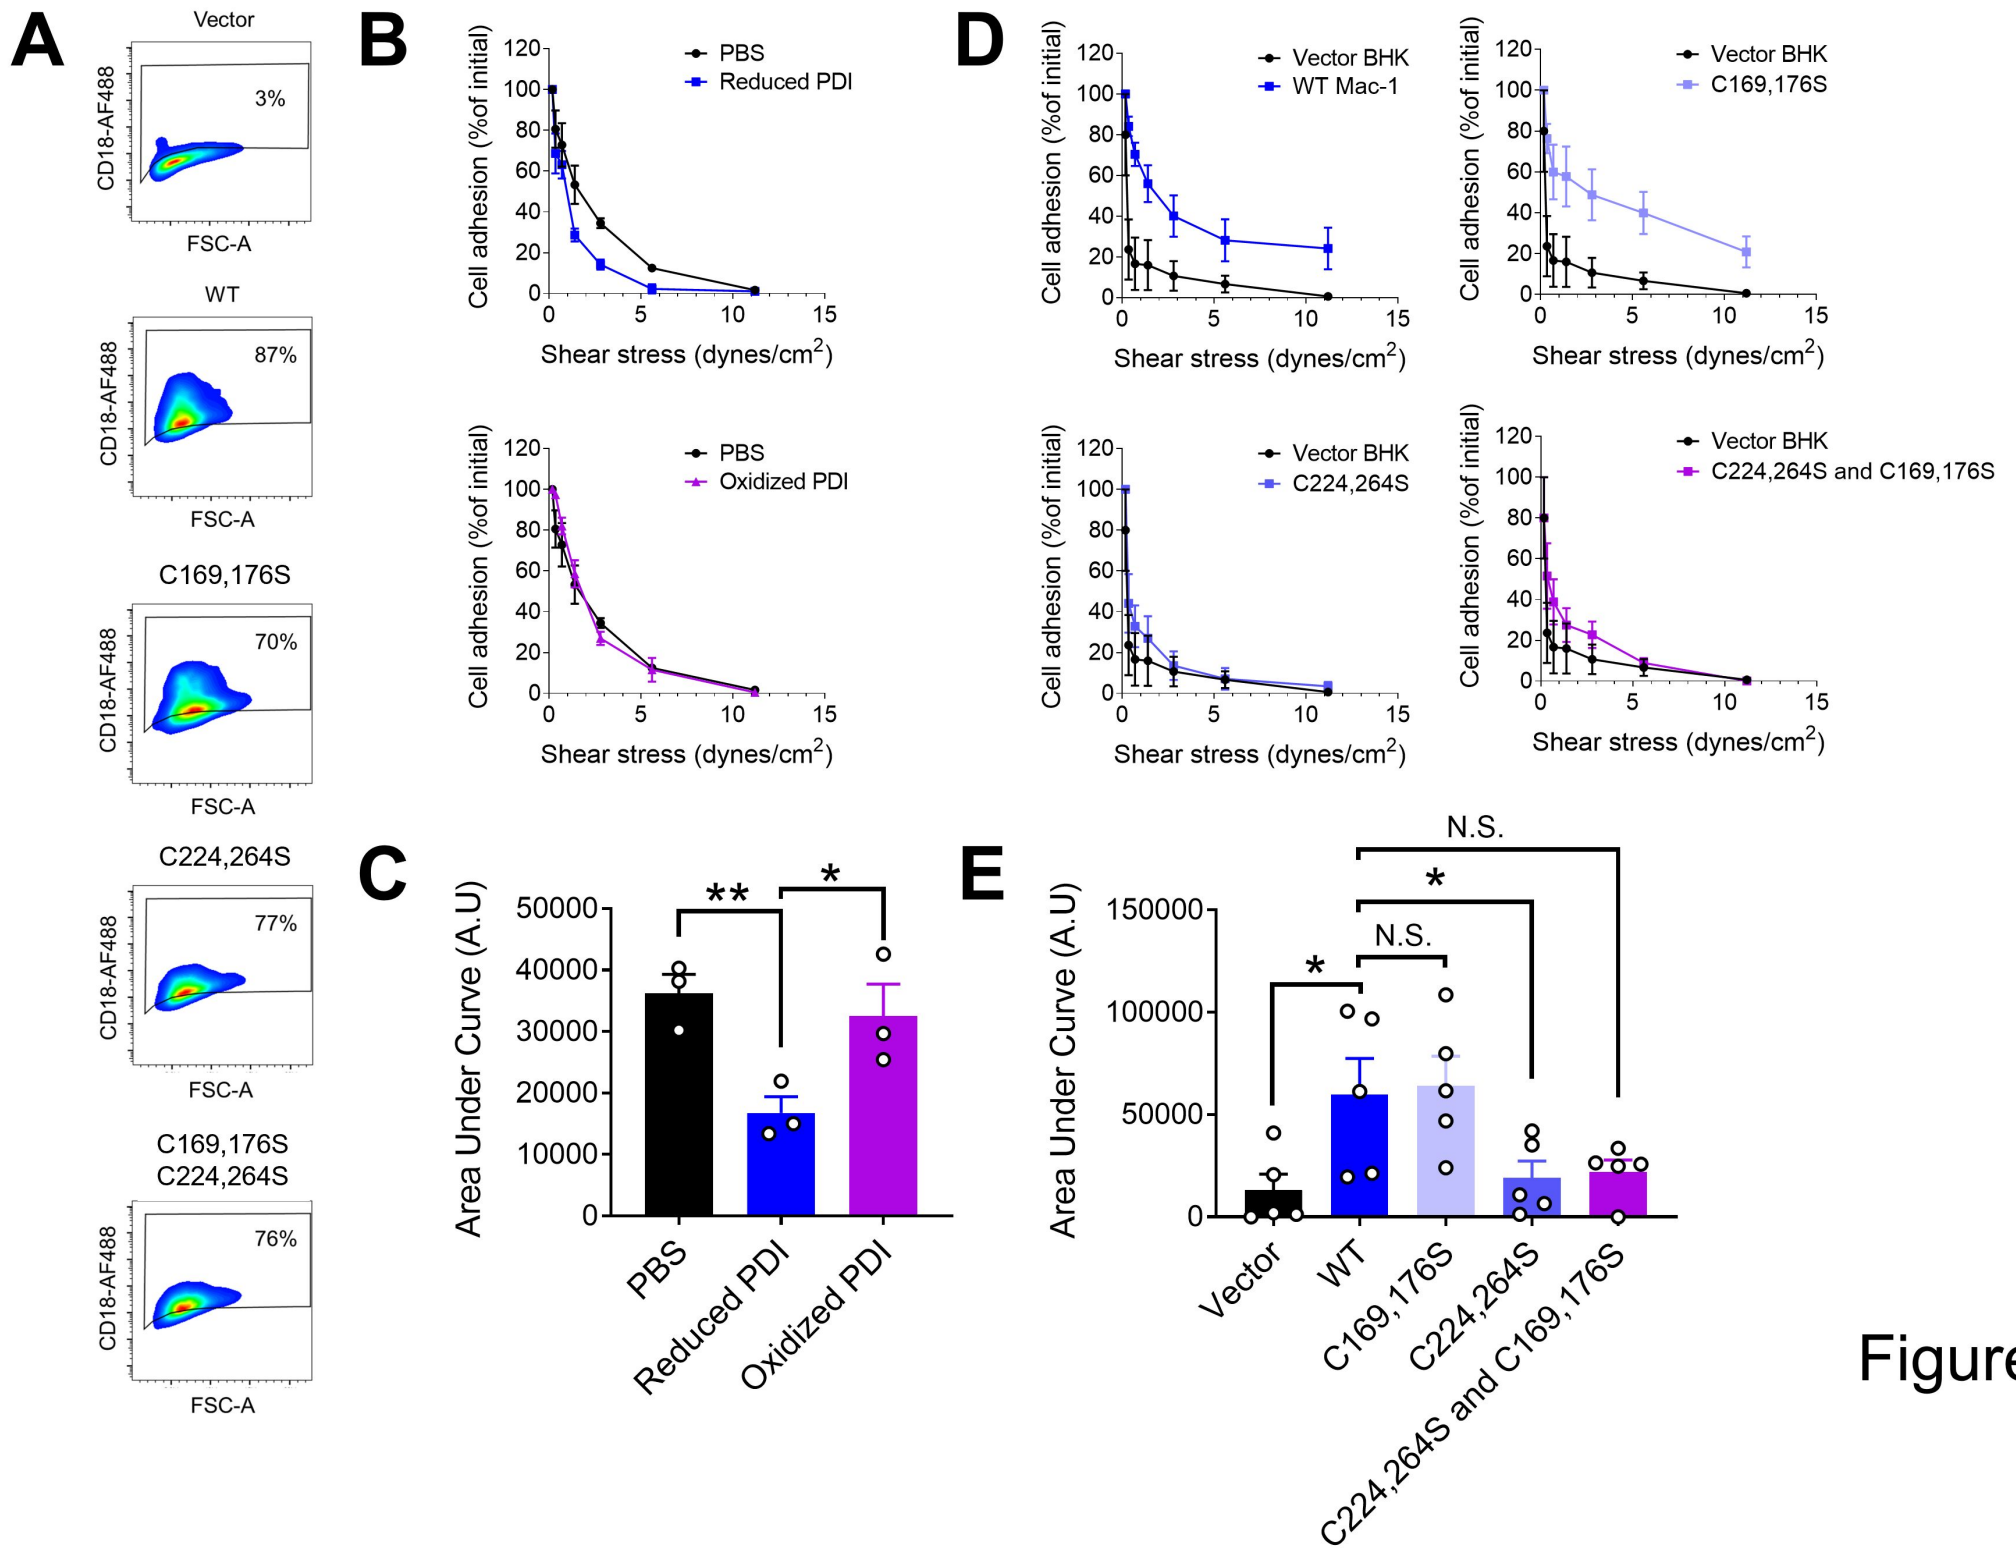

Figure 3



# ICAM-1

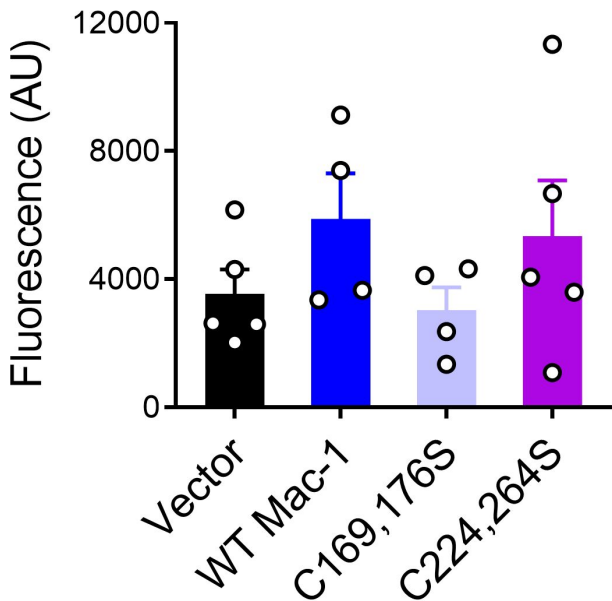

Figure 3-figure supplement 1

**A**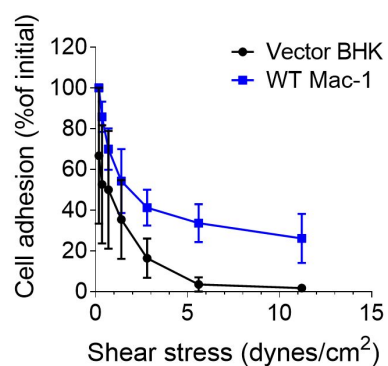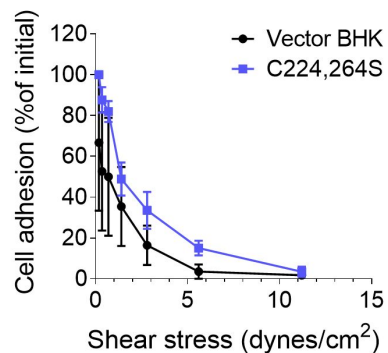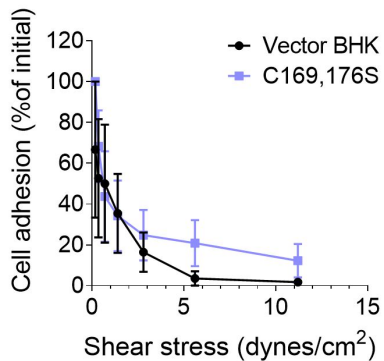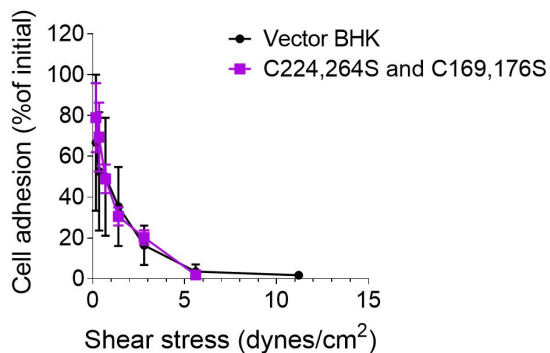**B**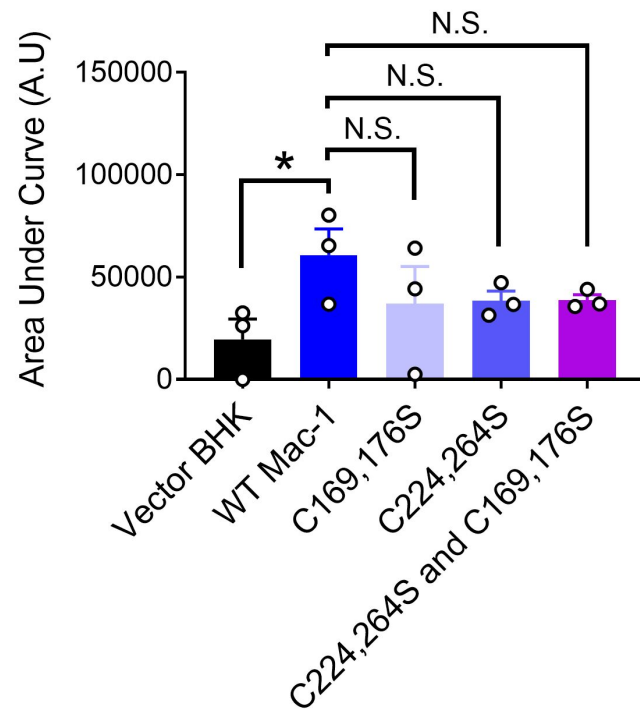

Figure 3-figure supplement 2

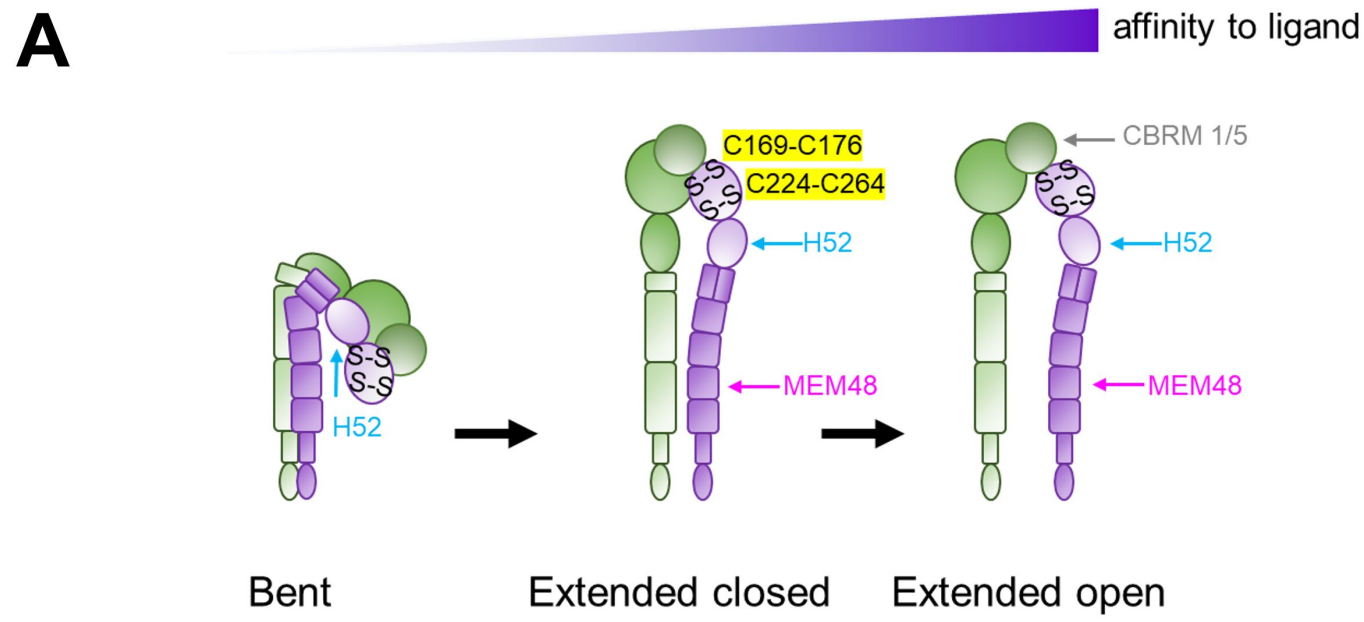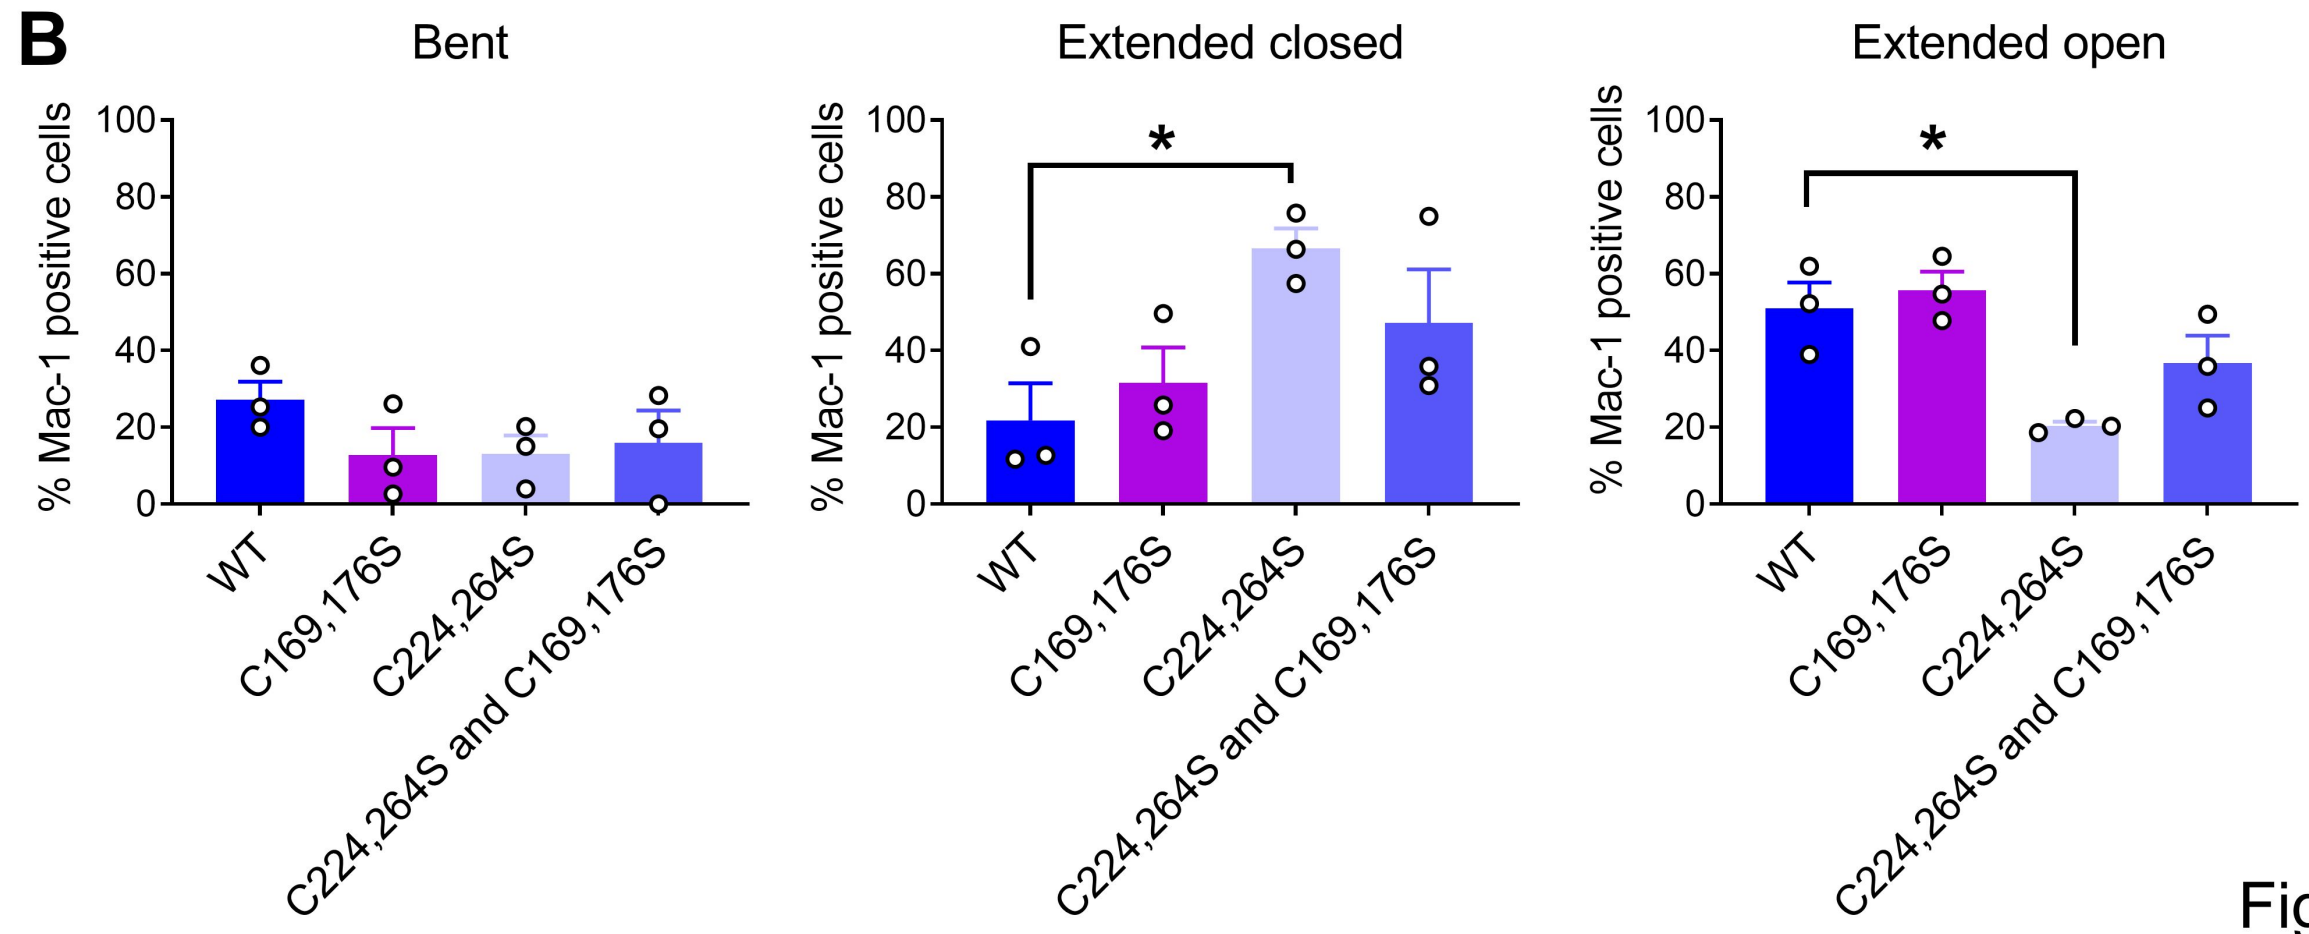

Figure 4

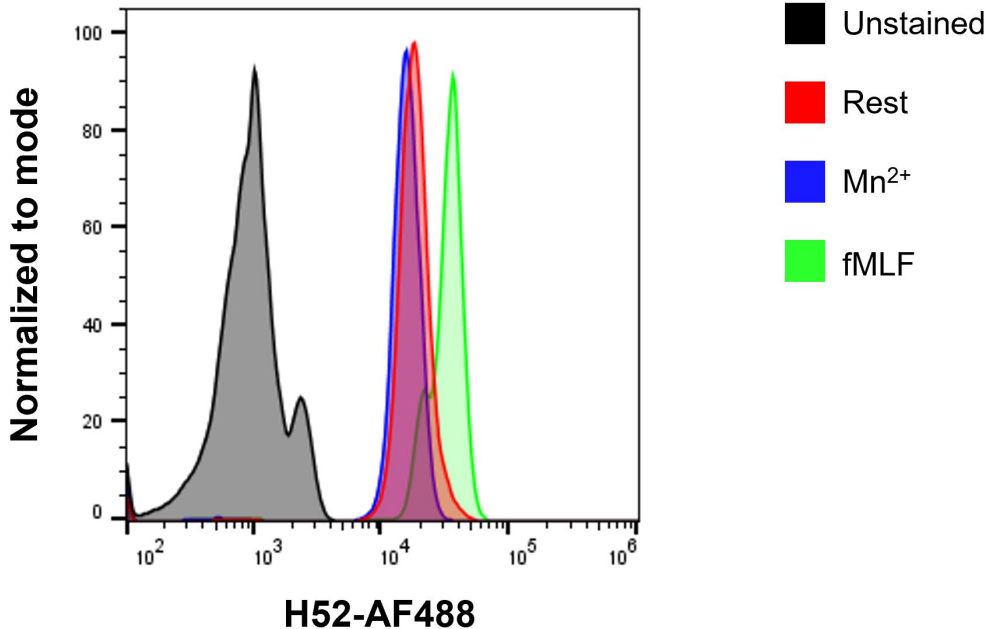

Figure 4-figure supplement 1

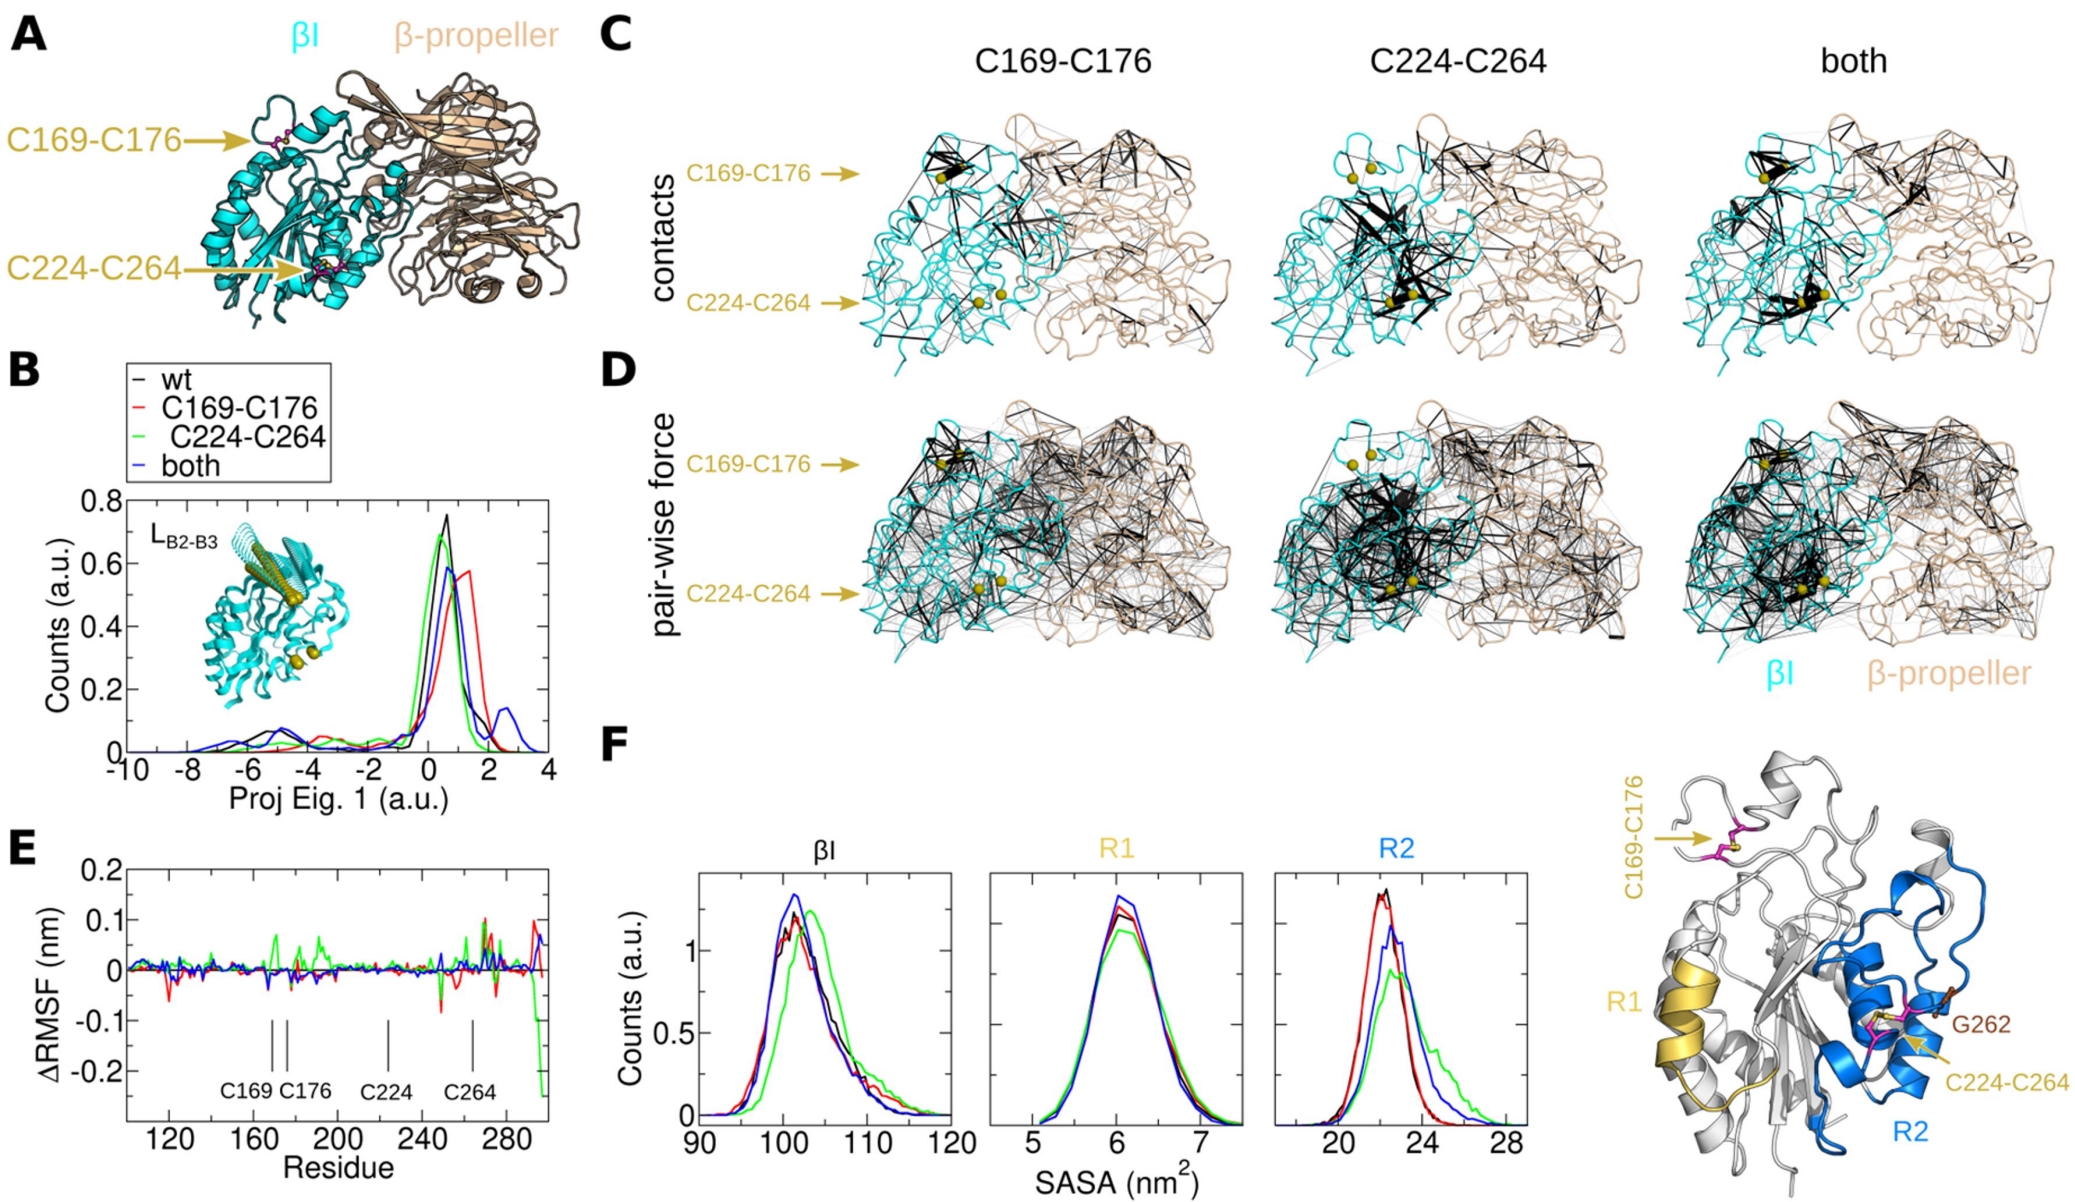

Figure 5

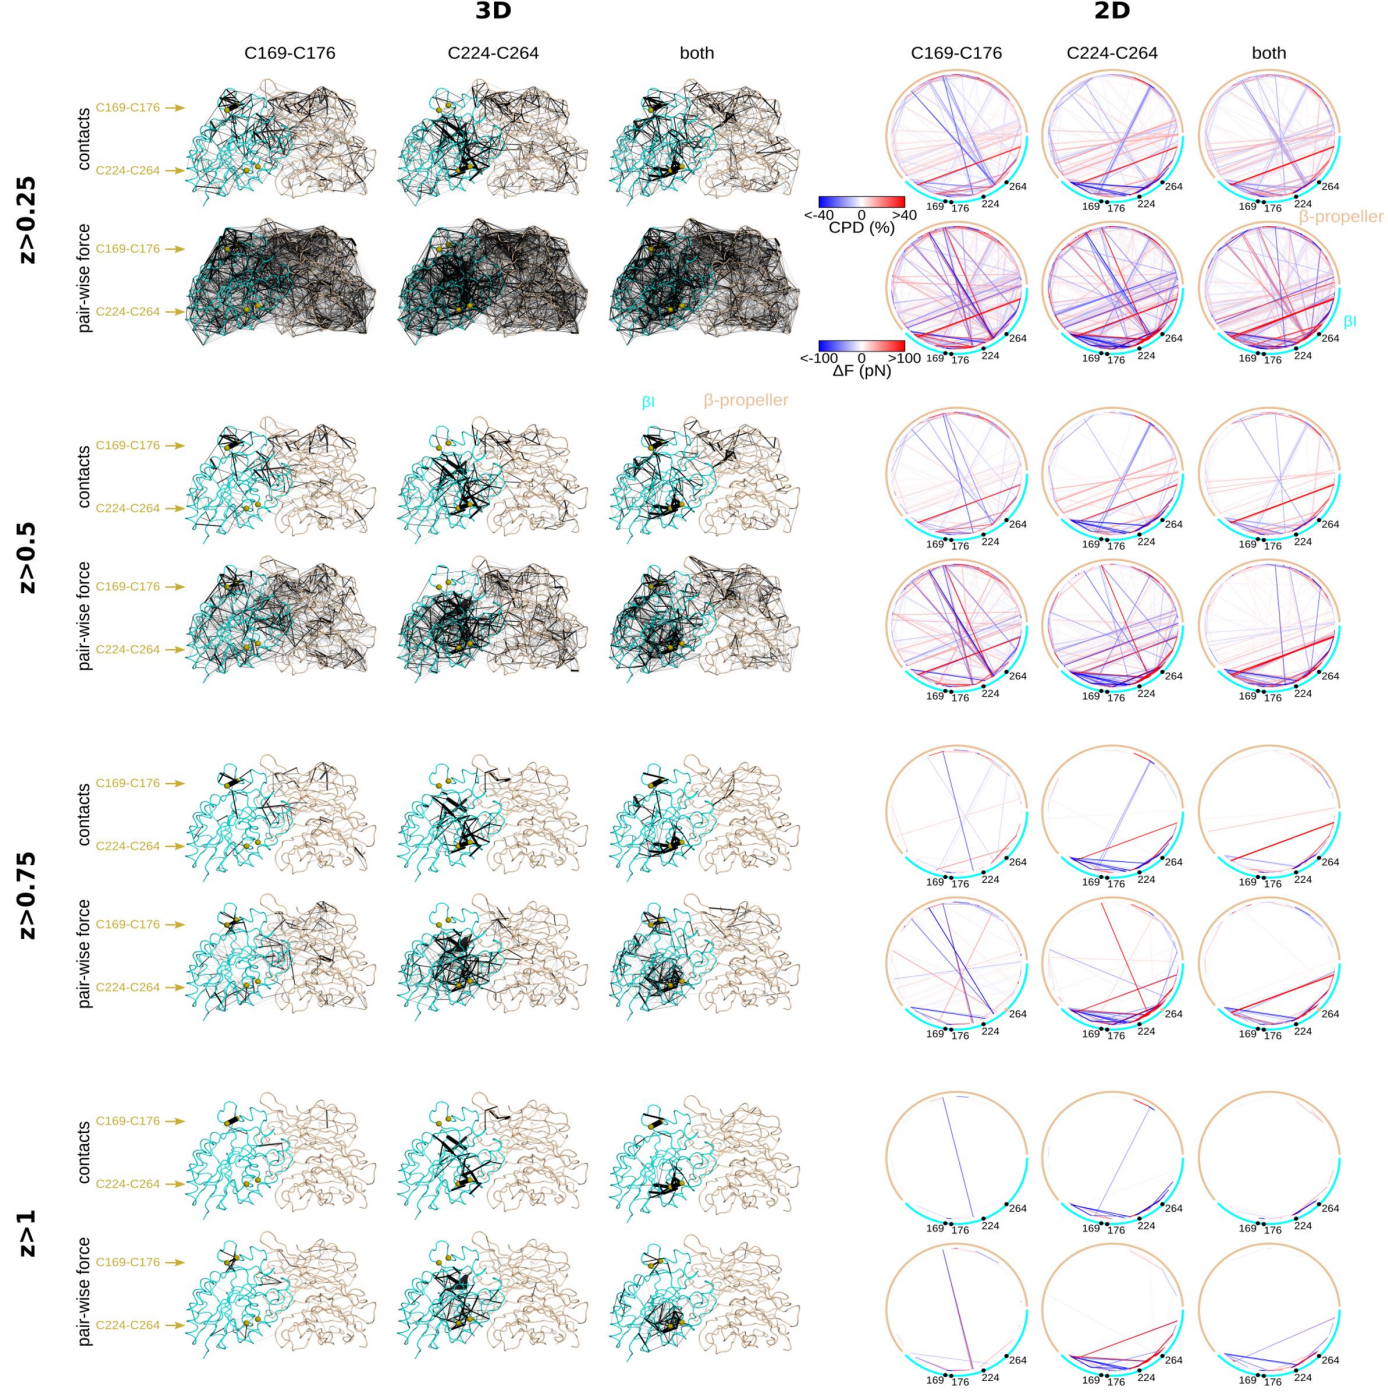

Figure 5-figure supplement 1

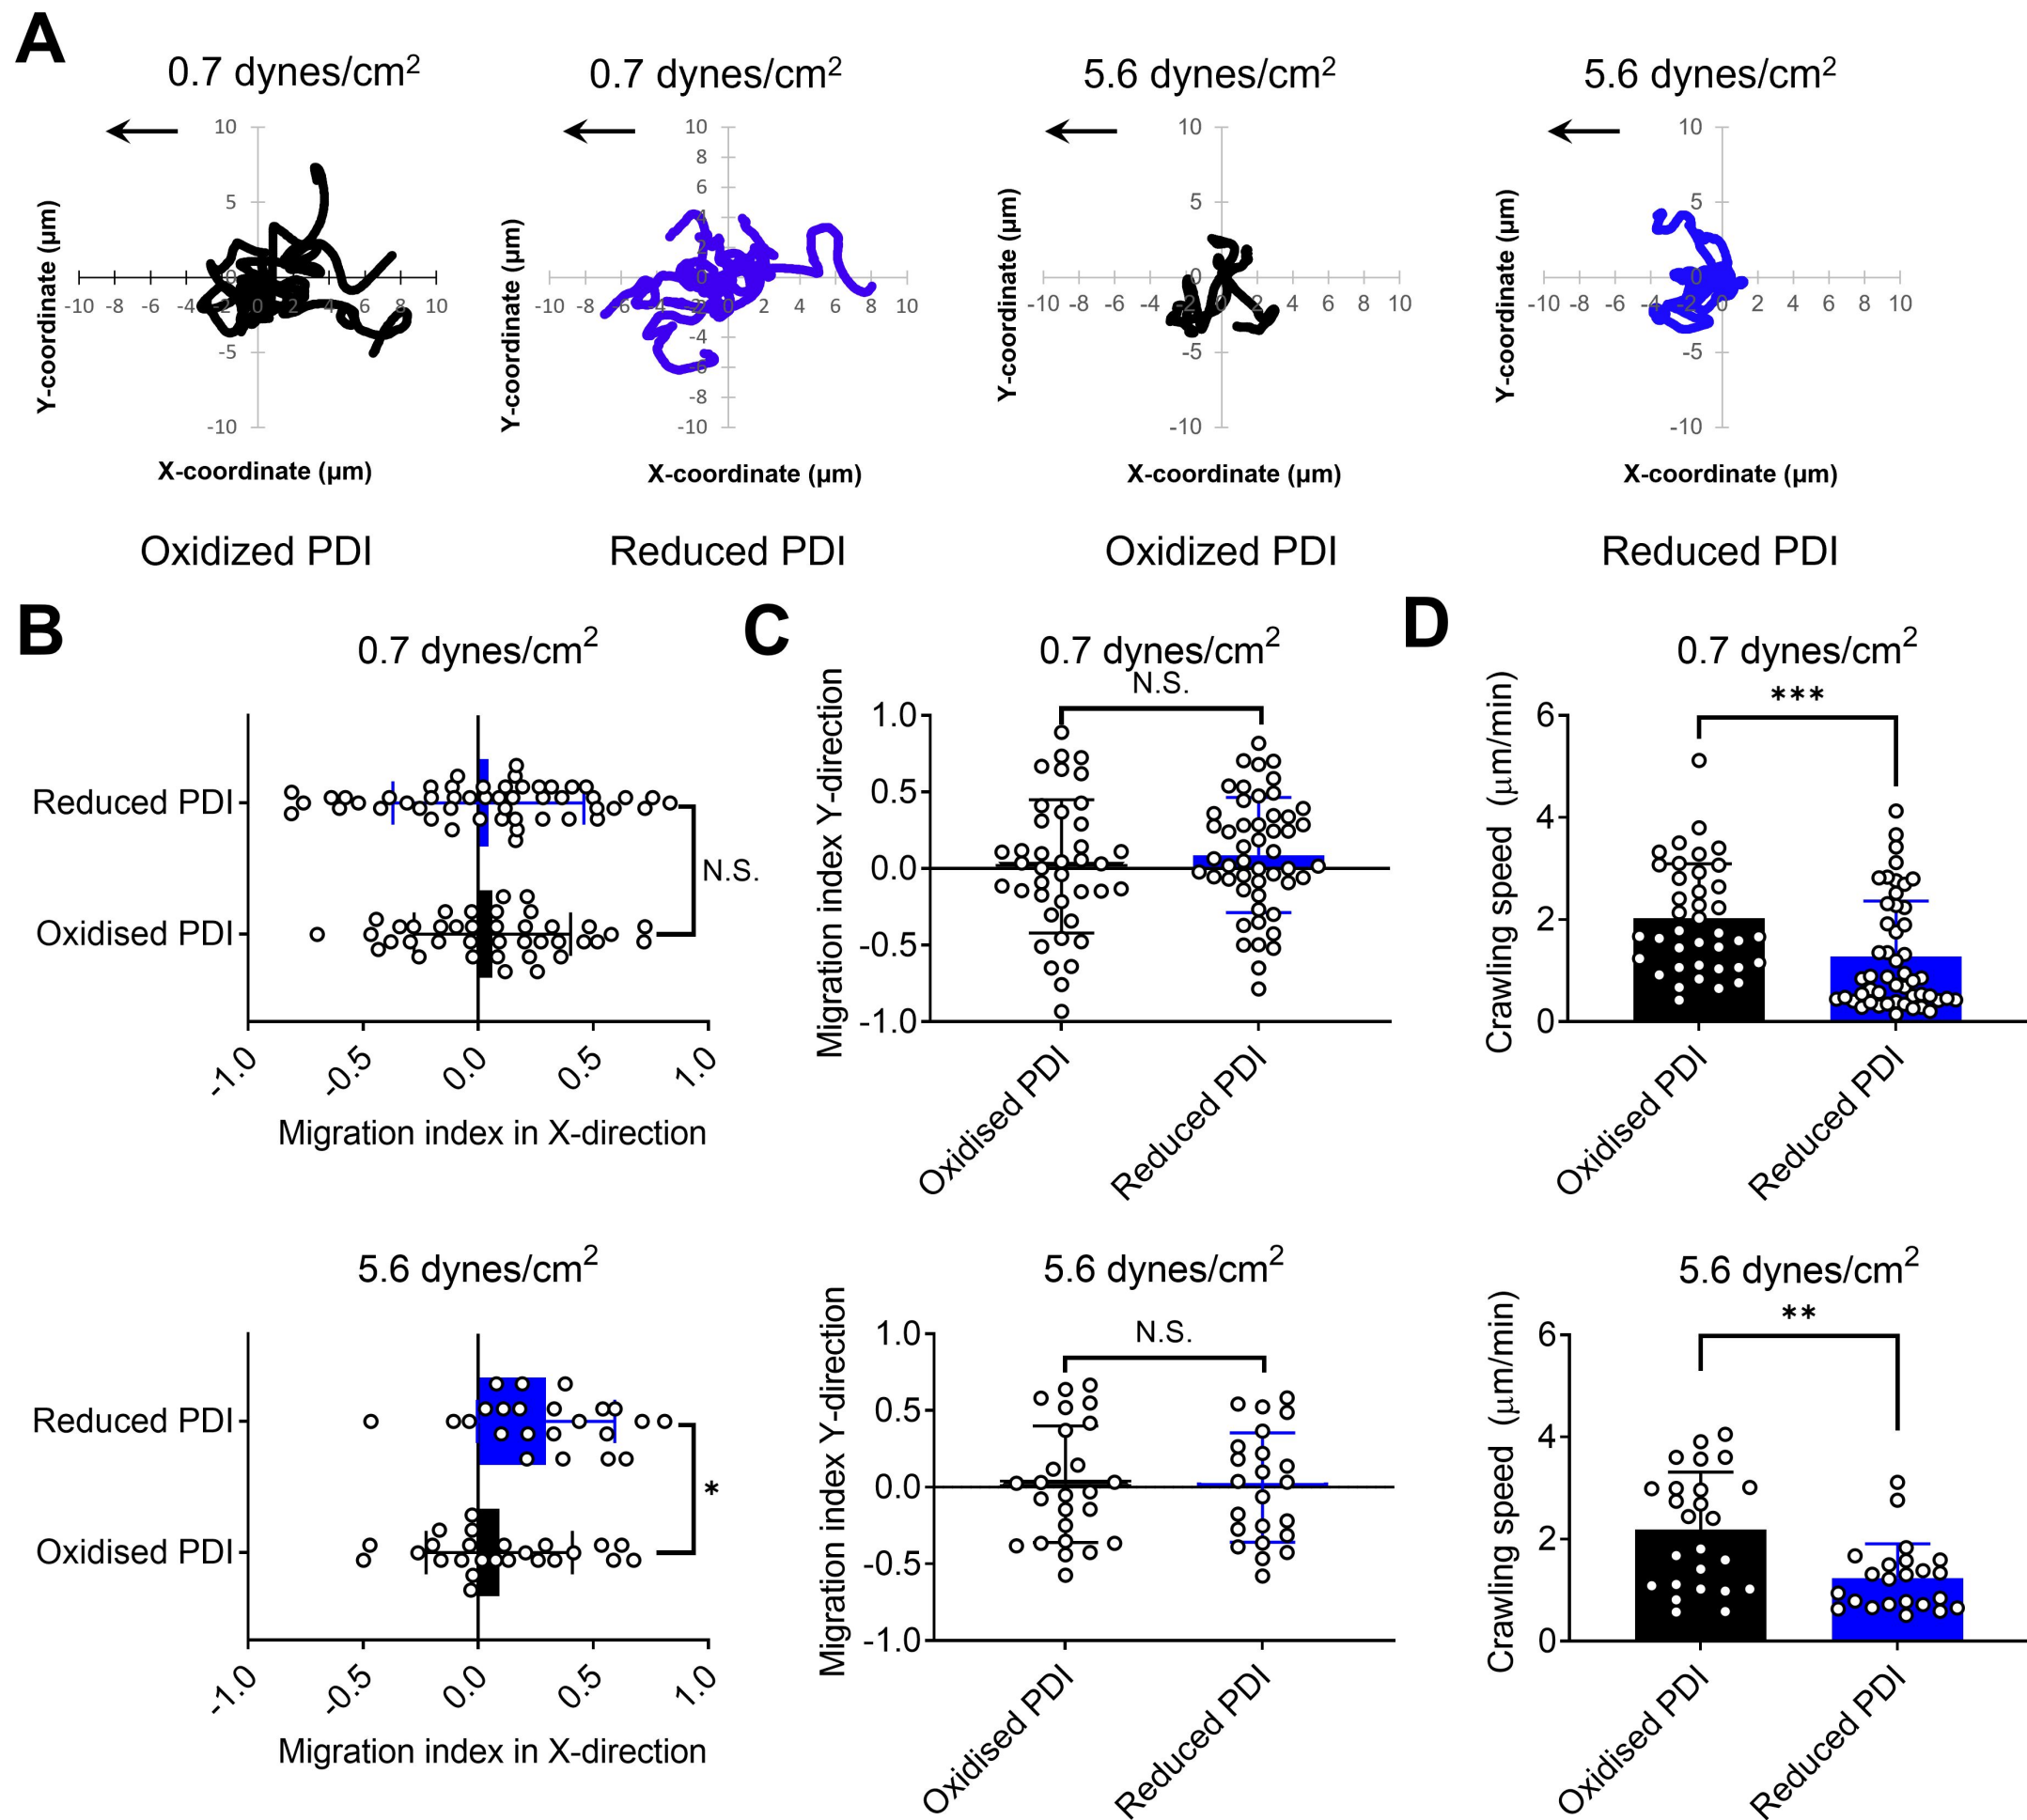

Figure 6

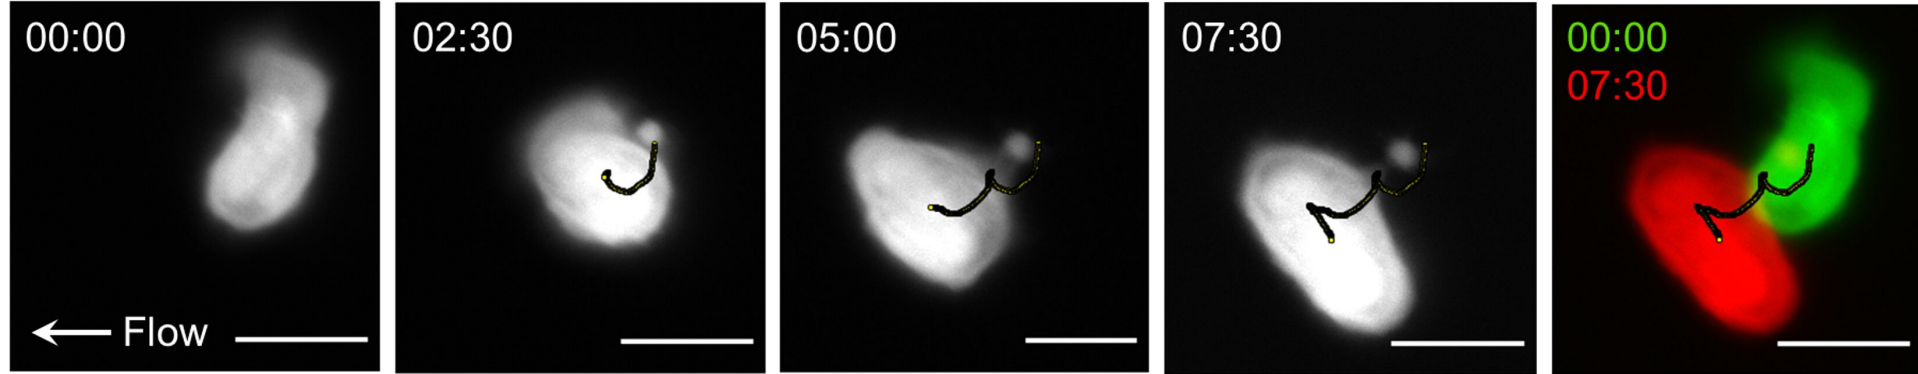

Figure 6-figure supplement 1



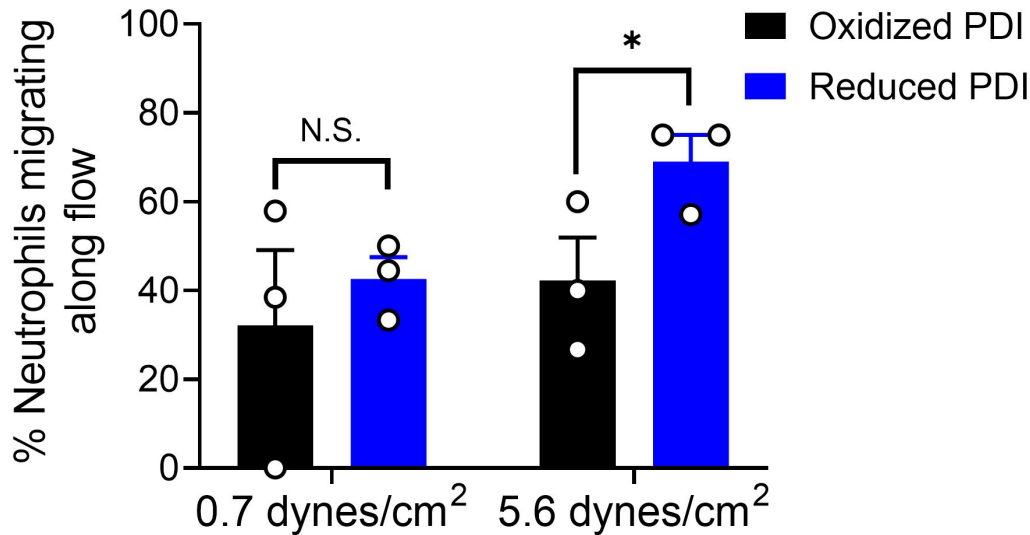

Figure 6-figure supplement 2

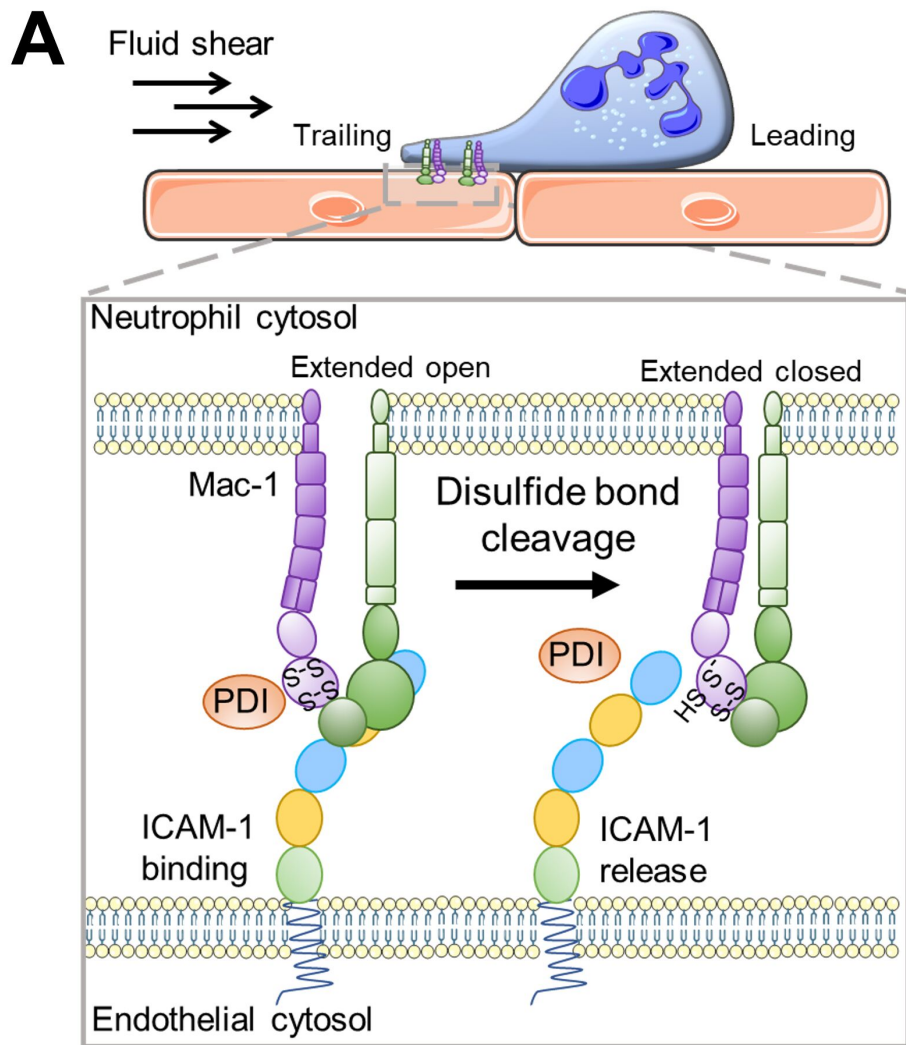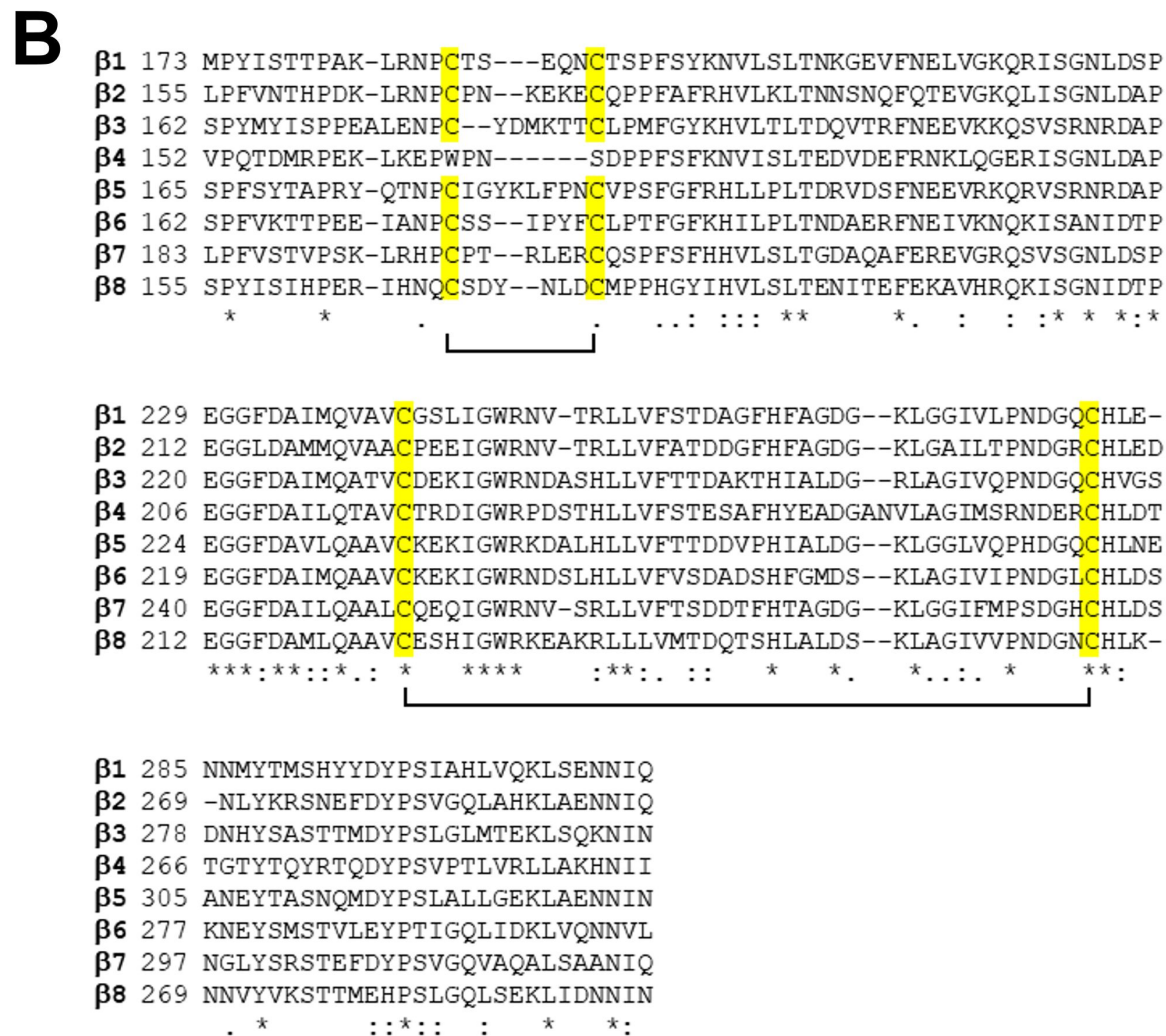

Figure 7
